1 **New insights into the evolution of SPX gene family from algae to legumes; a focus on soybean**

2 Mahnaz Nezamivand Chegini<sup>1\*</sup>, Esmail Ebrahimie<sup>1,2,3</sup>, Ahmad Tahmasebi<sup>4</sup>, Ali Moghadam<sup>1</sup>,

3 Saied Eshghi<sup>5</sup>, Manijeh Mohammadi-Dehchesmeh<sup>3</sup>, Stanislav Kopriva<sup>6\*</sup>, Ali Niazi<sup>1\*</sup>

4 <sup>1</sup> Institute of biotechnology, Shiraz university, Shiraz, Iran

5 <sup>2</sup> La Trobe Genomics Research Platform, School of Life Sciences, College of Science, Health and  
6 Engineering, La Trobe University, Melbourne, VIC 3086, Australia

7 <sup>3</sup> School of Animal and Veterinary Sciences, The University of Adelaide, Adelaide, SA 5371,  
8 Australia

9 <sup>4</sup> Department of Crop Production and Plant Breeding, College of Agriculture, Shiraz University,  
10 Shiraz, Iran

11 <sup>5</sup> Department of Horticultural Science, School of Agriculture, Shiraz University, Shiraz, Iran

12 <sup>6</sup> Institute for Plant Sciences, Cluster of Excellence on Plant Sciences, University of Cologne,  
13 Cologne, Germany

14 \* Correspondence: [niazi@shirazu.ac.ir](mailto:niazi@shirazu.ac.ir), [ma\\_nezami65@yahoo.com](mailto:ma_nezami65@yahoo.com).

15 **Abstract**

16 **Background:** SPX-containing proteins have been known as key players in phosphate signaling  
17 and homeostasis. In Arabidopsis and rice, functions of some SPXs have been characterized, but  
18 little is known about their function in other plants, especially in the legumes.

19 **Results:** We analyzed SPX gene family evolution in legumes and in a number of key species from  
20 algae to angiosperms. We found that SPX harboring proteins showed fluctuations in domain  
21 fusions from algae to the angiosperms with, finally, four classes appearing and being retained in  
22 the land plants. Despite these fluctuations, Lysine Surface Cluster (KSC), and the third residue of  
23 Phosphate Binding Sites (PBS) showed complete conservation in almost all of SPXs except few  
24 proteins in *Selaginella moellendorffii* and *Papaver sumniferum*, suggesting they might have  
25 different ligand preferences. In addition, we found that the WGD/segmentally or dispersed  
26 duplication types were the most frequent contributors to the SPX expansion, and that there is a  
27 positive correlation between the amount of WGD contribution to the SPX expansion in individual  
28 species and its number of EXS genes. We could also reveal that except SPX class genes, other  
29 classes lost the collinearity relationships among Arabidopsis and legume genomes. The sub- or  
30 neo-functionalization of the duplicated genes in the legumes makes it difficult to find the  
31 functional orthologous genes. Therefore, we used two different methods to identify functional  
32 orthologs in soybean and Medicago. High variance in the dynamic and spatial expression pattern  
33 of GmSPXs proved the new or sub-functionalization in the paralogs.

34 **Conclusion:** This comprehensive analysis revealed how SPX gene family evolved from algae to  
35 legumes and also discovered several new domains fused to SPX domain in algae. In addition, we  
36 hypothesized that there different phosphate sensing mechanisms might occur in *S. moellendorffii*  
37 and *P. sumniferum*. Finally, we predicted putative functional orthologs of AtSPXs in the legumes,

38 especially, orthologs of AtPHO1 and AtPHO1;H1, involved in long-distance Pi transportation.  
39 These findings help to understand evolution of phosphate signaling and might underpin  
40 development of new legume varieties with improved phosphate use efficiency.

41

42 Keywords: phosphate homeostasis, evolution, gene family, legumes

43

## 44 **Background**

45 Phosphorus (P) as an essential macronutrient serves as a structural element for many organic  
46 compounds, involved in multiple biosynthetic and metabolic processes [1, 2]. P containing  
47 molecules play a central role in various physiological processes, including respiration,  
48 photosynthesis, membrane transport, regulation of enzyme activity, oxidation-reduction reactions  
49 and signal transduction throughout plant growth, and development [3, 4]. Therefore, plants have  
50 evolved a number of mechanisms to ensure that P is readily available for all these processes. In  
51 particular, a wide range of responses are induced by phosphate (Pi) starvation [5, 6]. The regulation  
52 occurs at both transcriptional and posttranscriptional levels and many components of the  
53 regulatory network are known. The central regulator of the Pi starvation response and signaling  
54 network is the MYB transcription factor, AtPHR1 or OsPHR2 [7-9]. The PHR factors are  
55 negatively regulated through interaction with SPX domain proteins, which serve as sensors of P-  
56 status of the cells. In high P availability, inositol polyphosphates (PP-InsPs) bind to the basic  
57 surface of SPX domain proteins and facilitate their binding to PHR. This interaction may sequester  
58 PHR1 in the cytosol or prevent its association with DNA in the nucleus [10]. In low P supply, low  
59 availability of PP-InsPs-SPX results in the release of PHR1 to translocate to nucleus and to activate  
60 Pi starvation induced (PSI) genes [8]. Additionally, SPX domain proteins were shown to be  
61 involved in nitrate-phosphate signaling crosstalk in rice where nitrate-dependent interaction with  
62 NRT1.1B caused ubiquitination and degradation of OsSPX4 and consequently translocation of  
63 OsPHR2 and OsNLP3 into nucleus to induce PSI genes and nitrate inducible genes, respectively  
64 [11].

65 Despite the importance of SPX domain proteins in Pi signaling and nitrogen-dependent phosphate  
66 homeostasis, the functionality of all these proteins is still unclear. SPX domain proteins are

67 important components of plant Pi homeostasis and can be divided into four classes based on the  
68 presence of extra domains: while class 1 only includes SPX domain, other three classes (SPX-  
69 EXS, SPX-MFS, SPX-RING), contain extra EXS, MFS, or RING domains, respectively [6]. There  
70 are four and six members of the SPX class 1 in Arabidopsis and rice, respectively [12, 13] as  
71 AtSPX3 and OsSPX1 act as negative regulators of Pi starvation signaling [12, 13]. Indeed,  
72 AtSPX1, localized in the nucleus, has a high binding affinity for AtPHR1 under high P condition  
73 and prevents it from activation of the downstream Pi starvation-induced (PSI) genes [8]. The rice  
74 OsSPX4 protein involved in the nitrate dependent regulation of Pi uptake [11] also belongs to this  
75 class. The most functional variation was observed in the EXS class members, including AtPHO1  
76 and AtPHO1;1 involved in long-distance Pi transport from roots to shoots [14, 15], AtPHO1;4  
77 with a role in response of hypocotyls to blue light [16], seed size and flowering [17-19] and  
78 AtPHO1;10 being induced by numerous stresses, such as local wounding [20, 21]. The Major  
79 Facilitator Superfamily (MFS) domain confers transport activity, therefore, SPX-MFS class are  
80 involved in both transport and signaling [22]. Finally, members of SPX-RING class are also called  
81 Nitrogen Limitation Adaptation (NLA) proteins due to their first identified role in nitrogen  
82 starvation resistance [23].

83 Recently, two other classes of SPX proteins, SPX-SLC and SPX-VTC, were characterized in algae  
84 as involved in polyphosphate synthesis and its transportation into vacuoles [24]. These two classes  
85 seem to be lost during the evolution of plants with shifting the type of phosphate storage from  
86 polyP in algae to Pi in the later-diverging Streptophytes [24]. It seems there have been some extra  
87 domains fused with SPX domain that might have been lost during the evolution of SPX proteins  
88 and that have not been comprehensively explored yet [25].

89 Legumes (Fabaceae) are the second most important family of crop plants economically [26].  
90 Characterization of the SPX gene family in legumes can be helpful to gain insights into  
91 mechanisms of Pi homeostasis and thus underpin development of P efficient varieties. In this  
92 study, we performed a comprehensive analysis of SPX proteins from several legume crops  
93 (soybean, alfalfa, and common bean), and compared with species of more basal taxonomic groups  
94 such as mosses (*Phiscomitrella patens*), liverworts (*Marchantia polymorpha*), lycophytes  
95 (*Selaginella moellendorffii*), basal angiosperms (*Papaver somniferum*, *Amborella trichopoda*, and  
96 *Nymphaea colorata*), Rhodophytes (*Cyanidioschyzon merolae*, *Galdieria sulphuraria*, and  
97 *Chondrus crispus*), chlorophytes (*Chlamydomonas reinhardtii* and *Ostreococcus lucimarinus*),  
98 and charophytes (*Chara braunii*). We analyzed SPX protein evolution through phylogenetic  
99 analysis, conserved motif changes, and identification of ancestral motifs. In addition, because of  
100 only a partial functional characterization of SPX in legumes [27-31], we identified their functional  
101 orthologs with well-characterized SPXs from *Arabidopsis thaliana*. Since sequence-based  
102 orthology identifications alone have weakness in the one-to-many or many-to-many orthologs,  
103 expressologs identification was used as a complementary approach for functional ortholog  
104 identification [32]. With the combination of these two methods, we identified the functional  
105 orthologs of key regulators AtPHO1, AtPHO1;H1, AtSPX4, AtPHO1;H10, and AtNLA2 in the  
106 three legumes. In addition, we identified novel domains in SPX proteins of algae and functionally  
107 characterized SPX proteins in soybean and Medicago.

## 108 **Results**

### 109 **Identification of SPX domain proteins from algae to legumes**

110 While in several plant species four families of SPX proteins were characterized, much less is  
111 known about these proteins in legumes: in soybean and common bean just 10 and 3 members of

112 class 1 were characterized and no SPX proteins in *M. truncatula*. Therefore, we intended to  
113 characterize this protein family in these legume species and set it into evolutionary context by  
114 analysis of SPX proteins from algae and basal plants. Sequences of SPX proteins were obtained  
115 by BLASTP searches at EnsemblPlants from the legumes (*G. max*, *P. vulgaris*, and *M. truncatula*),  
116 moss (*P. patens*), liverwort (*M. polymorpha*), lycophyte (*S. moellendorffii*), basal angiosperms (*P.*  
117 *somniferum*, *A. trichopoda*, and *N. colorata*) rhodophytes (*C. merolae*, *G. sulphuraria*, and *C.*  
118 *crispus*), chlorophytes (*C. reinhardtii* and *O. lucimarinus*), and charophytes (*C. braunii*) protein  
119 databases using full-length amino acid sequences of SPXs from Arabidopsis (20 proteins). After  
120 removing sequences lacking the SPX domains and redundant and partial sequences, we compiled  
121 all SPX proteins in the latest version of protein database in EnsemblPlants for these 15 species.  
122 Some proteins were shorter than 200 aa and were excluded from further analyses, including four  
123 short proteins of soybean (*GLYMA\_12G154800*, *GLYMA\_10G097000*, *GLYMA\_09G098200*,  
124 *GLYMA\_20G032200*), two partial proteins of common bean (*PHAVU\_010G0720001g*,  
125 *PHAVU\_010G0720000g*), one protein of *M. truncatula* (*MTR\_8g058603*). In addition, we  
126 excluded one protein of *M. truncatula* (*MTR\_0262S0060*), where its corresponding gene is located  
127 on a scaffold but not chromosomes, and one protein of common bean (*PHAVU\_007g1245000g*),  
128 which had different structure from other SPX genes. Finally, 34 SPX proteins in *G. max*, 19 in *M.*  
129 *truncatula*, 17 in *P. vulgaris*, 22 in *P. patens*, 10 in *M. polymorpha*, 2 in *C. merolae*, 4 in *G.*  
130 *sulphuraria*, 2 in *C. crispus*, 5 in *C. reinhardtii*, 2 in *O. lucimarinus*, 4 in *C. braunii*, 42 in *P.*  
131 *somniferum*, 11 in *A. trichopoda*, 16 in *N. colorata*, and 31 in *S. moellendorffii* were identified  
132 (Supplemental Table S1). Furthermore, the proteins were classified into the four subfamilies based  
133 on their additional domains. Interestingly, in some algae and basal plants, we found extra domains  
134 that have not been previously reported (Figure 1). Totally, among these species, class EXS was

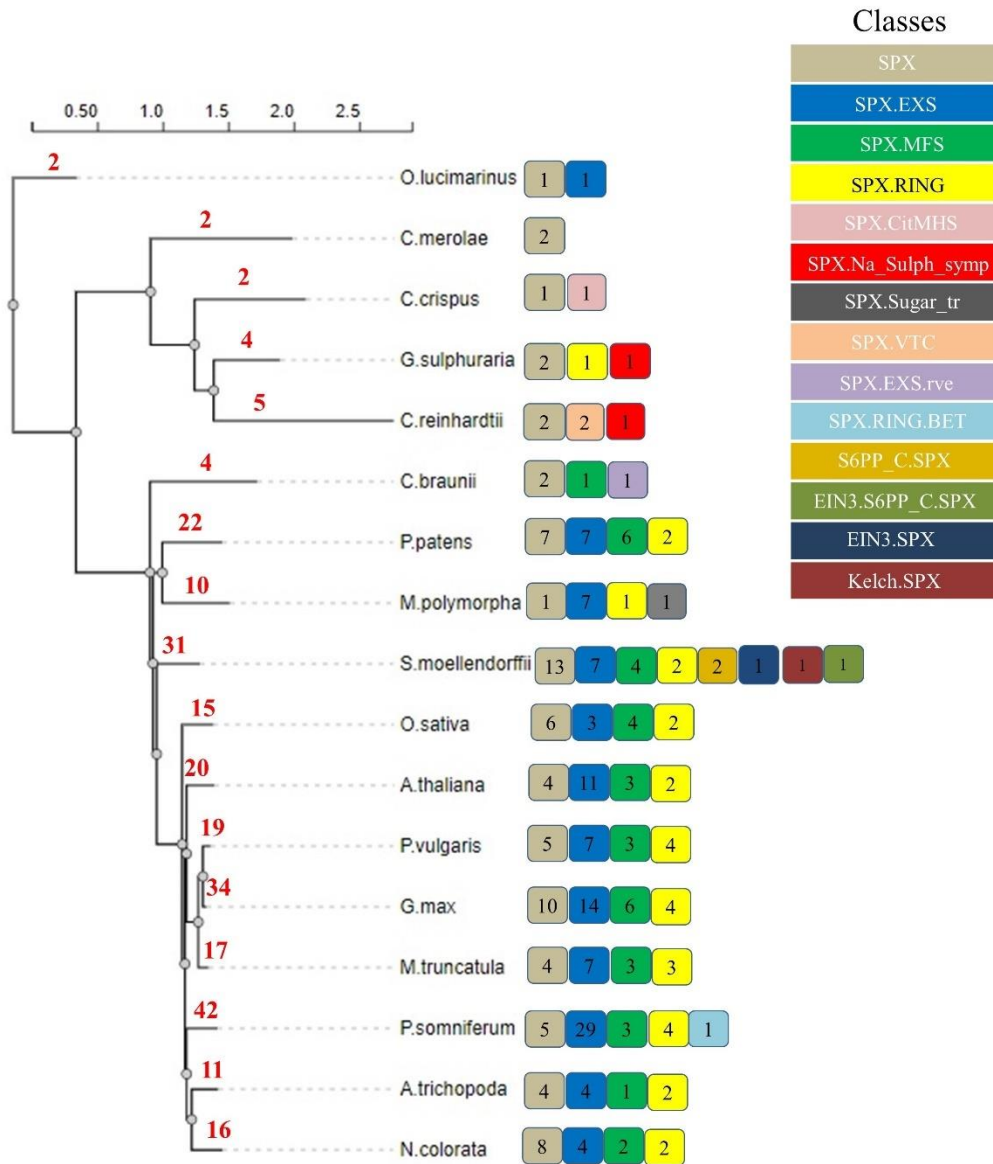

135

136 Figure 1. Evolution and frequency of genes in different SPX classes from algae to current Angiosperms. The species tree was  
 137 constructed based on protein sequences of identified SPXs. Types of classes are shown in different colored boxes, the numbers in  
 138 boxes represent the number of identified genes in each class while the total number of identified SPXs in each species is written in  
 139 red on the branches.

140

141 with 88 proteins the largest, followed by SPX class with 48 proteins and MFS and RING classes

142 containing 29 and 26 proteins, respectively. Subsequently, the corresponding SPX genes in



143 soybean, *M. truncatula* and common bean were named in each subfamily based on their  
144 chromosomal positions (Supplemental Table S1).

145 As can be seen in the Figure 1, all basal and current angiosperms possess only the four main classes  
146 of SPX proteins. On the other hand, some additional domains were observed in liverwort,  
147 lycophyte, and algae based on Pfam and CDD scanning of sequences; SPX-VTC (vacuolar  
148 transporter chaperone), EIN3-SPX (Ethylene intensive 3), SPX-CitMHS (Citrate transporter),  
149 SPX-Na\_sulph\_symp (sodium sulphate symporter), SPX-RING-BET (Bromodomain extra-  
150 terminal-transcription regulation), S6PP\_C-SPX (Sucrose-6P-phosphate phosphohydrolase C-  
151 terminal), EIN3-S6PP\_C-SPX, Kelch-SPX (Galactose oxidase), SPX-EXS-rve, and SPX-Sugar\_tr  
152 (Figure 1). The exact roles of these additional domains in the basal plants and algae are not  
153 completely known. It was previously reported that in some SPX proteins, SPX domain was located  
154 at C terminal instead of N terminal [33]. Indeed, we observed this structure in 4 different classes  
155 in *S. moellendorffii*, including EIN3-S6PP\_C-SPX, Kelch-SPX, EIN3-SPX, and S6PP\_C-SPX.

156 Predicted physiochemical and biochemical parameters of these SPX proteins in legume crops are  
157 listed in Supplemental Table S1. Indeed, members of the same subfamily have similar properties.  
158 The most variation in physiochemical parameters was observed in EXS class, while MFS class  
159 was the most similar. For example, lengths of all SPX-MFS proteins in the three species ranged  
160 from 691 to 700 aa, but the corresponding SPX-EXS proteins ranged from 475 to 1570 aa with the  
161 MtEXSs having the largest proteins in comparison with soybean and common bean. SPX-EXS  
162 and SPX-RING classes have the highest isoelectric point (pI), above 9 and 8, respectively. The  
163 calculated values for aliphatic index of SPX proteins show that the SPX-MFS subfamily have most  
164 thermostability, with a range of 105 to 111. GRAVY value (grand average of hydropathicity) is  
165 the sum of the hydropathy values of all amino acids divided by the protein length. Except for the

166 proteins in the SPX-MFS subfamily, nearly all of the GmSPXs are hydrophilic, with a GRAVY  
167 value less than 0. Subcellular localization prediction performed with Wolf PSORT revealed that  
168 most of the GmSPX proteins are located in the plasma membrane or endomembrane system,  
169 followed by nucleus and chloroplast. In PSORT results, all members of SPX-EXS and SPX-MFS  
170 subfamilies were located in the plasma membrane, and all members of SPX-RING were located  
171 in nucleus, corresponding to the known functions of representatives of these subfamilies in  
172 Arabidopsis.

### 173 **Phylogenetic tree**

174 Multiple alignment of the SPX protein sequences from soybean, *M. truncatula*, common bean,  
175 Arabidopsis, rice, wheat, rapeseed, *A. trichopoda*, *C. braunii*, *C. reinhardtii*, *C. crispus*, *C.*  
176 *merolae*, *G. sulphuraria*, *M. polymorpha*, *N. colorata*, *O. lucimarinus*, *P. somniferum*, *P. patens*,  
177 and *S. moellendorffii*, as well as proteins from mouse, human, and *Caenorhabditis elegans* as an  
178 out-group, followed by phylogenetic analysis revealed four distinct clades of SPX proteins, SPX,  
179 EXS, MFS, and RING (Figure 2). This topology and distinct separation of four classes are  
180 consistent with previous studies on SPX gene family [3, 12, 13, 27, 34]. SPX and EXS sequences  
181 formed two distinct clades, while MFS and RING along with box. C (*OSTLU26654.EXS*, *CHC*  
182 *T00007225001.SPX.CitMHS*, *CHLRE* *09g251650V5.SPX.Na\_Sulph\_symp*, *C5167*  
183 *020395.NLA.BET*, *Gsu16460.SPX.NLA*, and *CMP022C.SPX*) and box. D  
184 (*Gsu35240.SPX.Na\_sulph\_symp*) have diverged from a common ancestor and form the third major  
185 clade. SPX clade was divided into three sub-clades; SPX-I, SPX-II, and SPX-III. SPX-II and SPX-  
186 III are specific to the basal and current angiosperms and the proteins in these two sub-clades are  
187 homologs of AtSPX3 and ATSPX1/2, respectively. On the other hand, SPX-I is comprised from  
188 homologs of the basal plants (lycophytes, liverwort, moss) and algae and few proteins from the

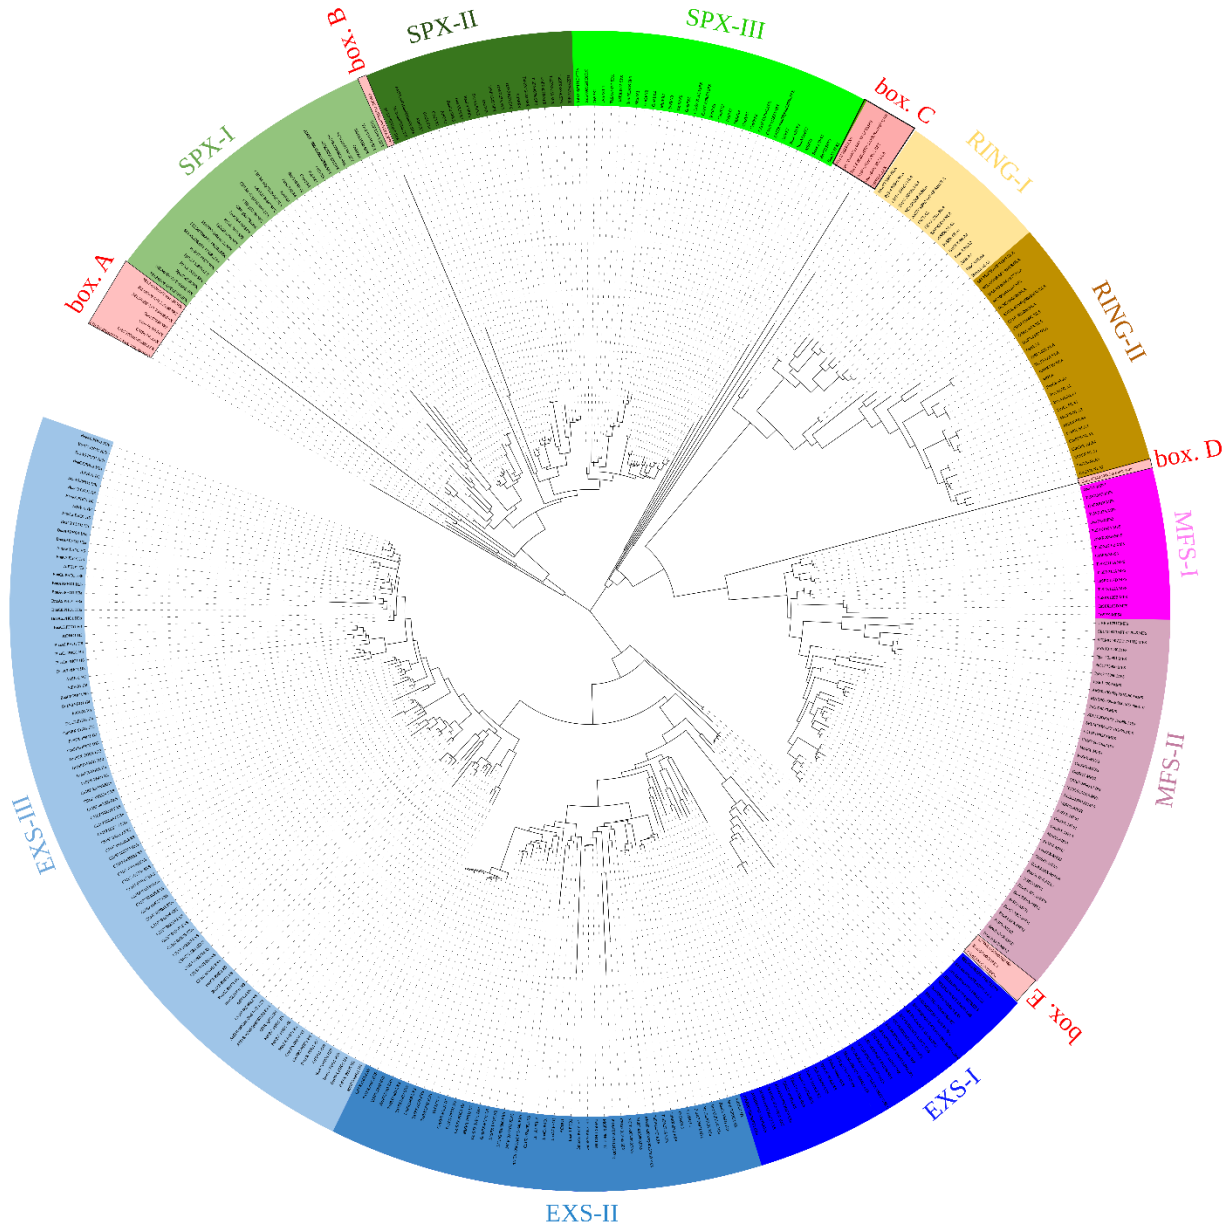

189

190 Figure 2. Phylogenetic analysis of 218 SPX containing proteins from 19 plant species. The phylogenetic tree was constructed using  
191 the Maximum Likelihood method. The SPX genes of Arabidopsis, rice, wheat, rapeseed, *M. truncatula*, soybean, and common bean  
192 are represented with At, Os, Ta, Bna, Mt, Gm, and Pv abbreviations, respectively. Other species are named based on their Gene  
193 IDs and their domains. Four different clades are marked in colors: SPX (green), RING (brown), MFS (pink), and EXS (blue). Sub-  
194 clades of each clade are shown with light and dark shades of the respective colors. Five boxes show paraphyletic branches; box E  
195 comprises the outgroup species.

196

197

198 basal and current angiosperms, all being homologs of AtSPX4. Proteins in box A and in box B  
199 could be ancient homologs for SPX-I and SPX-II/III, respectively. Likewise, EXS clade was  
200 divided into three sub-clades; EXS-I is specific to lower plants (*S. moellendorffii*, *M. polymorpha*,  
201 and *P. patens*), EXS-II is a mixed group from monocots, eudicots, and basal angiosperms, all  
202 homologs of AtPHO1 and AtPHO1;H1, and EXS-III contain eudicots and the basal angiosperms  
203 without any genes of monocots. The outgroup genes used in this study were grouped in box E  
204 clustered with EXS clade. Overall, topology of EXS class is consistent with He et al., (2013), in  
205 that basal plants (lycophytes and moss) EXS homologs were grouped separately from the  
206 angiosperms, and also with the previous reports on EXS genes that monocots only possess  
207 homologs for AtPHO1 and AtPHO1;H1 [6, 24, 35].

208 Box C with ancient genes for both MFS and RING and box D as sister for MFS class together with  
209 MFS and RING clades seem to have evolved from a common ancestor. MFS homologs in  
210 monocots specifically grouped in MFS-I, while MFS-II contained all MFS orthologs from the  
211 other species. This could suggest that differentiation among MFS proteins has occurred after the  
212 divergence of monocot and dicots from a common ancestor. Similarly, RING clade was divided  
213 into two sub-clades, but both contained RING orthologs from all of species; RING-I was grouped  
214 with the ancestor from *P. patens*, while RING-II included *S. moellendorffii* orthologs as its sister.  
215 The overall tree topology is very similar to results of Wang et al (2021), who investigated SPX  
216 gene family in chlorophytes and streptophytes, with focus on algae.

### 217 **Protein motifs gain and loss in SPX family throughout evolution**

218 Conserved protein motifs were predicted using MEME program for each SPX protein class and all  
219 species (Additional file 1: Figure S1 to S5). This analysis may explain when different classes of  
220 SPX proteins have appeared and how motifs were gained or lost in each class during the evolution.

221 The ancestral motifs in SPX domains such as motifs 3, 4, 2, and 1 seem to originate from red algae  
222 (Additional file 1: Figure S1). There is a high fluctuation of motif composition during the  
223 evolution. Some motifs are species specific like motifs 13, 14, and 19 that are present only in  
224 legumes, probably arising after legume whole-genome duplication event. The most variability in  
225 the motif composition was observed in *S. moellendorffii* with some specific motifs like 8, 15, and  
226 18. The lengths of proteins in angiosperms were very similar but shorter than in the basal plants.  
227 The EXS domain was detected only in *O. lucimarinus* with 9 motifs - 9, 6, 5, 2, 3, 11, 4, 10, and 1  
228 (Additional file 1: Figure S2). Almost all these motifs have been retained during the evolution as  
229 ancestral motifs. In addition, some other motifs appeared in *C. braunii* such as 15, 7, 16, 20, 12,  
230 and 8, suggesting they were present in the common ancestor of Chlorophyta and Streptophyta.  
231 Although Wang et al [24] reported one SPX-MFS in *M. polymorpha* genome, we could not find  
232 an intact SPX-MFS domain, but SPX-Sugar\_tr domain with a highly similar motif composition  
233 with other MFSs was identified (Additional file 1: Figure S3). As it has previously been reported,  
234 *PHT5* genes in *B. napus* have SPX domain connected to overlapping MFS and Sugar\_tr domains  
235 [36], however, we only found SPX and Sugar-tr domains in *M. polymorpha* genome. The first  
236 SPX-MFS protein was observed in *C. braunii* with 18 common motifs with other species. Two  
237 newly observed motifs in *P. patens*, motifs 16 and 13, probably have evolved by dispersed  
238 duplication in *P. patens* and have been retained in all basal and current angiosperms. Interestingly,  
239 other five MFSs in *P. patens*, without the motifs 16 and 13, have been no longer found in  
240 angiosperms.

241 The evolutionary oldest NLA has been detected in *G. sulphuraria* and it was retained during the  
242 course of evolution of current angiosperms, but was not found in other Rhodophytes or  
243 Chlorophytes. In fact, the only NLA identified in *G. sulphuraria* just showed two motifs in

244 common with other species, motifs 2 and 3 (Additional file 1: Figure S4). Therefore, these motifs  
245 could be considered as ancestral motifs of NLA class which then further evolved by dispersed  
246 duplication in *M. polymorpha*, adding motifs 8, 7, 1, and 6 into the ancestral domains. One NLA  
247 in *P. somniferum* underwent dispersed duplication and gained motif 10 that has only been retained  
248 in the core eudicots, while two NLAs in *S. moellendorffii* segmentally duplicated and gained two  
249 specific motifs 13 and 19. Motif 16 was just observed in legume genomes that might evolved after  
250 legume whole-genome duplication (WGD) event. The most variability in motif composition of  
251 NLA class was observed in *P. somniferum*. Motif compositions in the new identified classes  
252 showed a high variation and it was impossible to find their ancestral motif (Additional file 1: Figure  
253 S5). However, it could be concluded that SPX-Na\_Sulph\_sym and SPX-CitMHS with high  
254 similarity in the motif composition, probably have similar origin and function. In summary, during  
255 the evolution different duplication events added new motifs to the ancestral motifs and other motifs  
256 specifically appeared in individual species to acquire new functions.

### 257 **Consensus sequences of SPX domains from algae to eudicots**

258 We then predicted conserved motifs among all identified SPXs (Additional file 1: Figure S6).  
259 There are four conserved motifs in SPX class members, among them two motifs, 2 and 4, are  
260 common in the almost whole span of SPXs. Therefore, we can hypothesize that these two motifs  
261 have an important role for all SPXs. Afterwards, consensus sequences of these two motifs were  
262 constructed across all phyla (algae, charophytes, liverwort, bryophytes, lycophytes, basal  
263 angiosperms, and current angiosperms) and also across each class (SPX, EXS, MFS, RING, and  
264 new identified classes) (Additional file 1: Figure S7-S10). Motif 4 is 29 aa in length and was  
265 present in all SPX proteins except the following ten: C5167\_005902.EXS, C5167\_032842.EXS,  
266 C5167\_043562.EXS, C5167\_043565.EXS, C5167\_003186.NLA, C5167\_046257.NLA,

267 SELMODRAFT\_419593.SPX, SELMODRAFT\_419593.SPX, OsSPX4 and PvPHO1. Five  
268 amino acid residues, number 5, 9, 15, 19, and 24, were almost 100% conserved, except the fifth  
269 residue in *C. braunii* (Additional file 1: Figure S7). Regarding conservation in different classes  
270 (Additional file 1: Figure S8), the leucine (residue 9) was completely conserved in the EXS, MFS,  
271 RING, and new identified classes, then the phenylalanine (residue 19) was completely conserved  
272 in EXS and MFS classes, but SPX class had some members with different residues in these five  
273 positions with a very high overall conservation in this class. In addition, each class had other  
274 conserved residues, suggesting special functions.

275 Motif 2 is 21 aa long and was absent in CHLRE\_02g111650v5.SPX,  
276 AMTR\_s00106p00066860.SPX, NC1G0101580.SPX, C5167\_011965.SPX, Gasu\_57230.SPX,  
277 C5167\_043539.EXS, SELMODRAFT\_450458.EXS, SELMODRAFT\_431864.SPX,  
278 SELMODRAFT\_419593.SPX, and only one protein from the current angiosperm, PvPHO1;5,  
279 which is a partial protein. This motif exhibited more conserved residues at positions 1, 7, 8, 14,  
280 15, 16, 17, 18, 20, and 21. Residue 17 was completely conserved in the all proteins containing  
281 motif 2 and residues 14, 18, and 21 were conserved in the all proteins except a few in *S.*  
282 *moellendorffii* and *P. sumniferum* showing different residues instead of lysine (Additional file 1:  
283 Figure S9). The lysine residues 14, 17, and 21 form a Lysine Surface Cluster (LSC), and were  
284 found to interact with sulfate in the crystal structure of human phosphate transporter XPR1, and to  
285 be a part of a larger binding site for PP-InsP [9]. Consequently, in the different classes of the SPX  
286 proteins (Additional file 1: Figure S10), some of the 10 conserved positions were completely  
287 conserved such as K1, N8, KILKK (14 to 18) in RING and MFS, K18 in SPX, K21 in RING, and  
288 N8, I15, K18, as well as K21 were completely conserved across the new identified classes. Overall,  
289 these two motifs were conserved in all but a few proteins from *S. moellendorffii* and *P. sumniferum*,

290 PvPHO1;5, and OsSPX4, implying that they might possibly interact with InsP/PP-InsP in a  
291 different manner, as previously reported for OsSPX4 [9]. In addition, different conserved residues  
292 in different classes could suggest that they may have different phosphate-containing ligand or  
293 different levels of Pi in cells

#### 294 **Expansion pattern of SPX genes and collinearity analysis**

295 To pinpoint the expansion modes in the land plants, we investigated duplication types in basal and  
296 current angiosperms, liverwort, hornwort, and *S. moellendorffii* (Figure 3 and Supplemental Table  
297 S2). Taken together, WGD, segmental, and dispersed duplications contributed most to the SPX  
298 gene family expansion. The expansion patterns in soybean, *P. somniferum*, *N. colorota*, and *S.*  
299 *moellendorffii* mostly arose from WGD/segmental duplication type. However, *S. moellendorffii*  
300 did not have any WGD events, therefore, its expansion and unique SPX classes must have arisen  
301 through local or segmental gene duplication [37]. WGD/segmental duplication type did not  
302 participate in the SPX expansion in *A. trichopoda* and *M. polymorpha* genomes and it only resulted  
303 in one duplicated block in *P. patens* genome. In these three species, SPX expansion were affected  
304 mostly by dispersed duplication type. The high number of WGD/segmental types of duplication  
305 in *S. moellendorffii*, soybean, and *P. somniferum* can shed light on the reason of high variation of  
306 gene family sizes in the closely related plants.

307 To get more information about evolutionary process of genes, collinearity analysis can provide  
308 information about conserved genomic regions of genes in different species [38]. Synteny  
309 relationship among two or a set of genes from two species means that they located in the same  
310 chromosome [39], but collinearity is a specific form of synteny with conserved gene order [40].  
311 Collinearity analysis was conducted in three steps; 1. across *P. somniferum*, *N. colorota*, rice,



312 Arabidopsis, and three legumes 2. Among *P. somniferum* and *N. colorata*, *P. patens*, and *S.*  
 313 *moellendorffii* and 3. Among legumes.

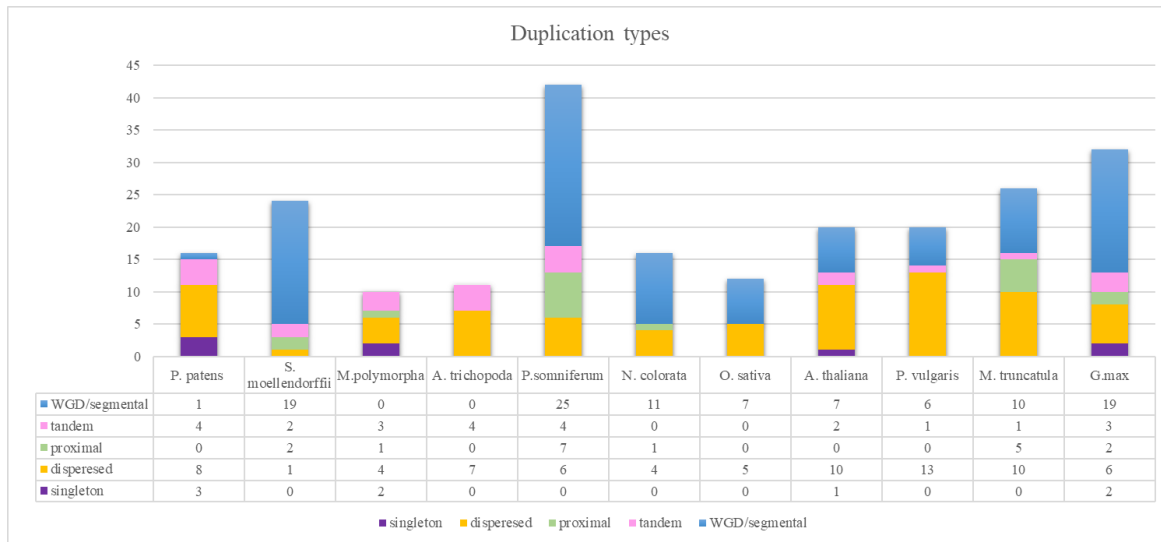

314

315 Figure 3. SPX gene family expansion from algae to the current Angiosperms. Duplication event types were predicted in the *P.*  
 316 *patens*, *S. moellendorffii*, *M. polymorpha*, *A. trichopoda*, *P. somniferum*, *N. colorata*, *O. sativa*, *A. thaliana*, *P. vulgaris*, *M.*  
 317 *truncatula*, *G. max*.

318

319 Collinearity analysis among legume crops, Arabidopsis, rice, and two basal angiosperms; *P.*  
 320 *somniferum* and *N. colorata* discovered 121 collinear blocks (Figure 4, Supplemental Table S3);  
 321 30 blocks in Gm/Pv, 23 blocks in Gm/Mt, 15 blocks in Gm/Gm, 14 blocks in Ps/Ps, 10 blocks in  
 322 Gm/At, 6 blocks in Nc/Nc and Pv/Mt, 3 blocks in Ps/Nc, Mt/At, Pv/At, and Os/Os, 2 blocks in  
 323 Ps/Gm, and 1 block in At/At, Pv/Pv, Ps/Mt, and Mt/Mt. Rice as the only monocot in this analysis  
 324 did not show any collinearity relationship for SPX gene family with other species.

325 Collinear SPX genes among *P. somniferum*, *S. moellendorffii*, *N. colorata*, and *A. trichopoda* were  
 326 predicted (Supplemental Table S3). *S. moellendorffii* did not show any collinearity relationship  
 327 with other species, while *N. colorata* and *P. somniferum* had the most inter species collinear  
 328 relationships (14). The most intra-genome collinear relationships were found in *P. somniferum*

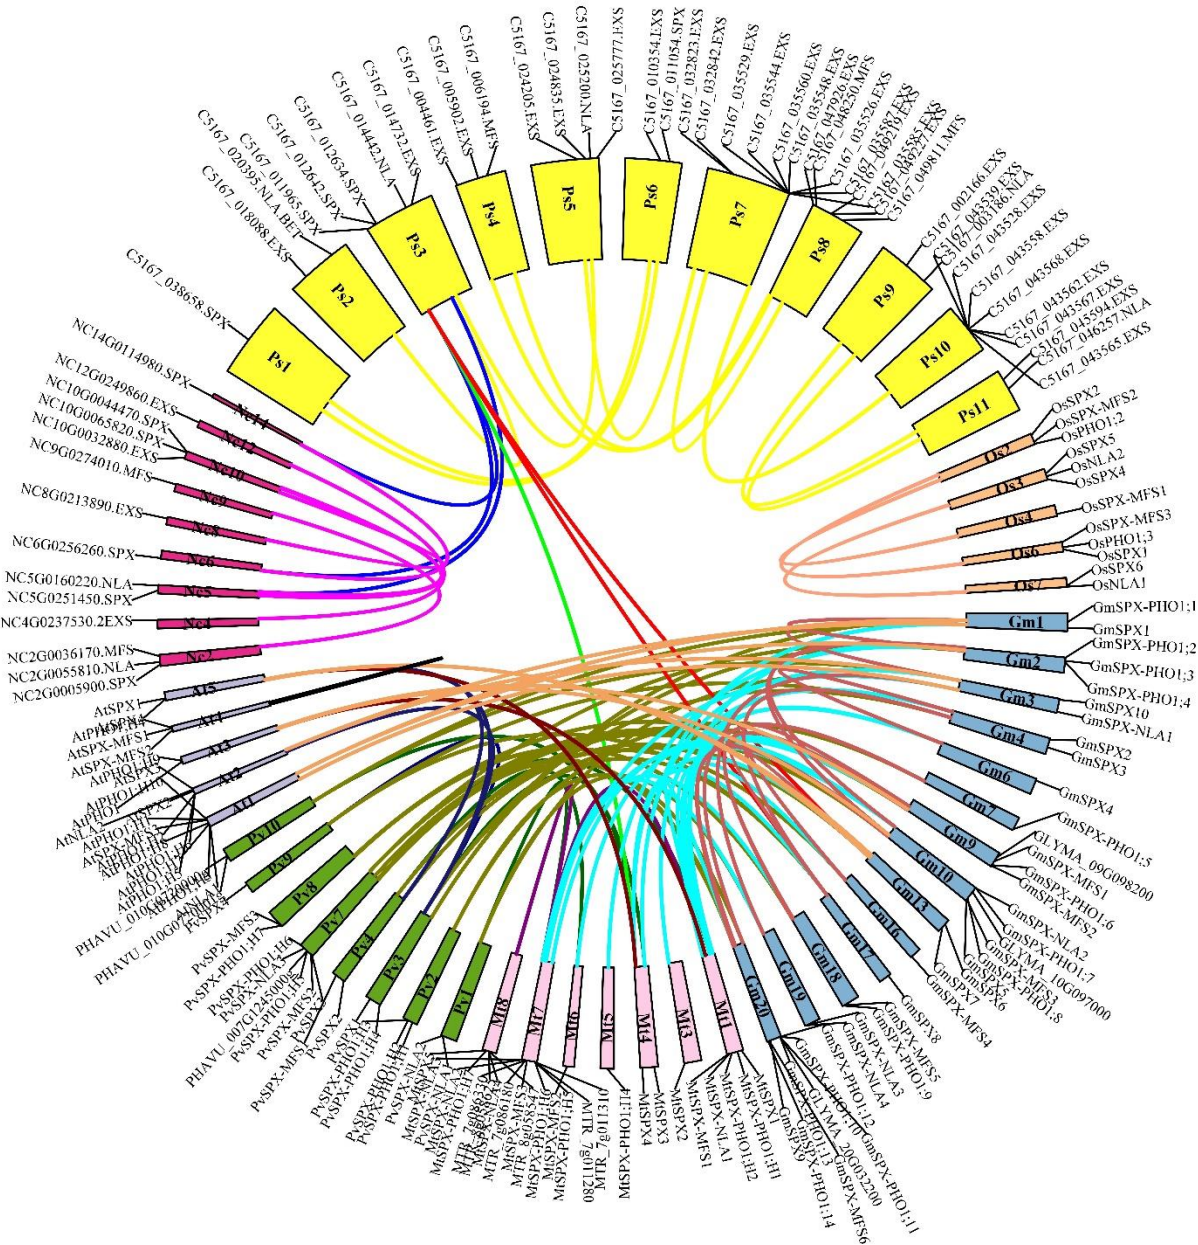

329

330 Figure 4. Circular collinearity plot of SPX gene family members among *G. max* (blue), *M. truncatula* (pink), *P. vulgaris* (green),  
 331 *A. thaliana* (grey), *O. sativa* (orange), *P. somniferum* (yellow), and *N. colorota* (red). Collinear genes are linked by lines and  
 332 boxes are representing chromosomes.

333

334 (14) and *S. moellendorffii* (10). The collinear analysis was performed also for the three legume  
 335 crops (Figure 5, Supplemental Table S3). Of the 34, 19, and 17 SPX genes in soybean, *M.*  
 336 *truncatula*, and common bean 32, 14, and 15 genes participated in collinear blocks. In total, 78

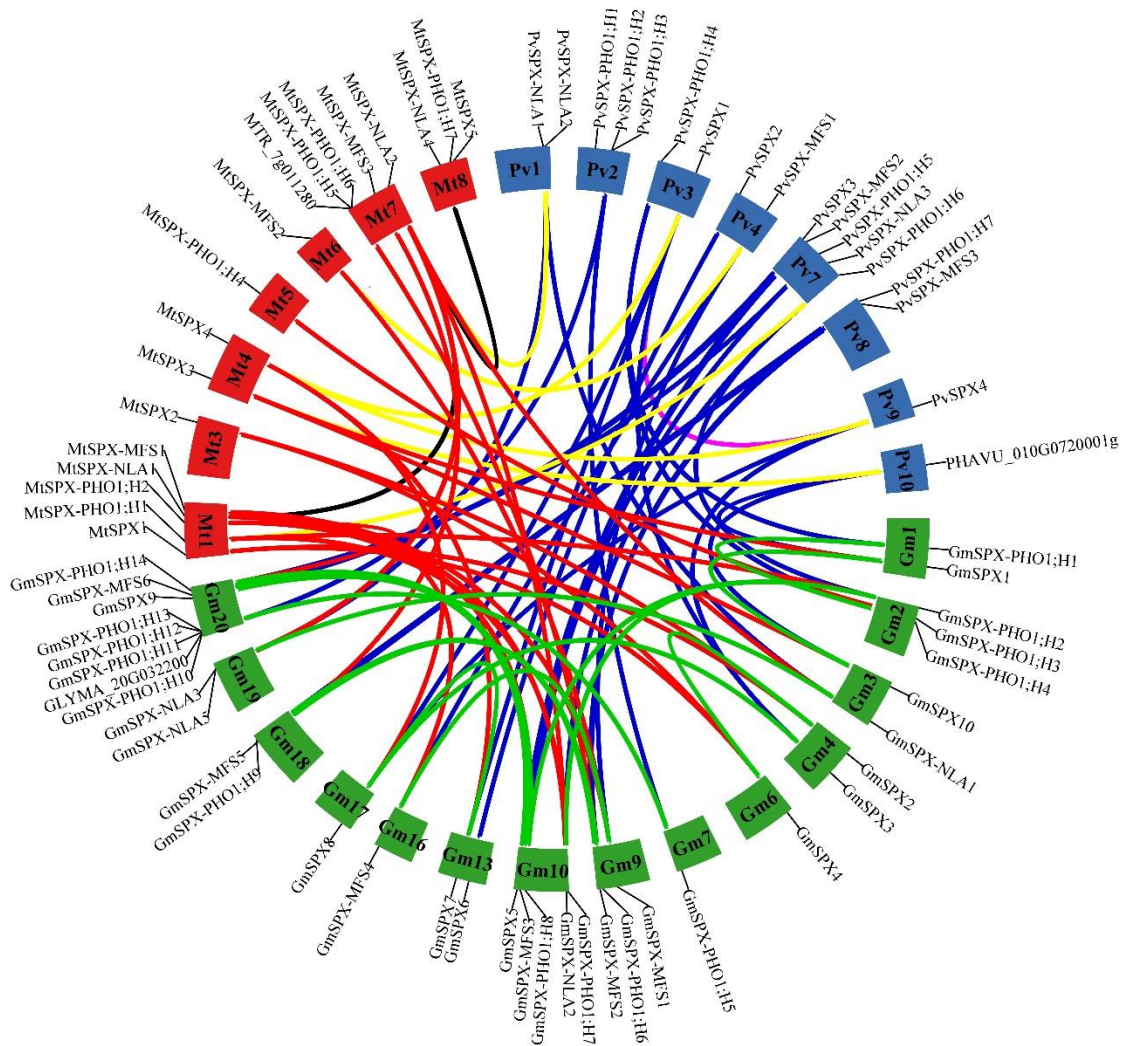

337

338 Figure 5. Circular collinearity plot of SPX gene family members among *G. max*, *M. truncatula*, *P. vulgaris*. Chromosomes of *G.*  
 339 *max*, *M. truncatula* and *P. vulgaris* are respectively in green, red and blue. Links between *G. max* and *M. truncatula* are colored  
 340 red, *G. max* and *P. vulgaris* in blue, *M. truncatula* and *P. vulgaris* in yellow as well as links within *G. max*, *M. truncatula* and *P.*  
 341 *vulgaris* are colored in green, black and pink.

342 collinearity blocks between these plant species were discovered. A high level of collinearity  
 343 relationships was found at 27/30 SPX genes in soybean/common bean and 19/23 SPX genes in

344 soybean/*M. truncatula*, while the corresponding figure for *M. truncatula*/common bean was 6/7.  
345 However, just 15, 7, and 2 collinearity blocks were found in soybean/soybean, *M. truncatula* /*M.*  
346 *truncatula*, and common bean/common bean groups. All in all, after these three collinearity  
347 analyses, we concluded that inter-species collinearity patterns among basal angiosperms and  
348 among current angiosperms have changed. Across basal angiosperms, SPX class had the least  
349 inter-species collinearity, while among Arabidopsis and legumes, SPX showed the most inter-  
350 collinearity relationships. It can be concluded that except in SPX class, collinearity in the other  
351 classes has been lost.

### 352 **Evolution of Cis-acting elements from algae to eudicots**

353 Transcription factors bind to the cis-acting elements (CREs) in the promoter and regulate the  
354 transcription of corresponding genes [41]. Therefore, genes with similar expression patterns may  
355 contain the same regulatory elements in their promoters [27]. To explore whether transcription  
356 factor binding sites have evolved together with the coding regions of SPX genes, 1.5 kb upstream  
357 of the transcriptional start sites of all identified SPXs were downloaded and analyzed using  
358 PlantCARE database. In total, 124 CREs were detected (Supplemental Table S4) that can be  
359 classified in three major groups: responsive to abiotic stresses (drought, low temperature, hypoxia,  
360 wounding, defense, and stress), hormones (gibberellin, abscisic acid (ABA), salicylic acid (SA),  
361 ethylene, methyl jasmonate (MeJA), and auxin), and development-related elements (endosperm,  
362 meristem, MYB, and zein metabolism regulation). After the essential elements in promoter like  
363 TATA-box and CAAT-box, the most highly represented cis-acting elements were those involved  
364 in response to MeJA (CGTCA-motif and TGAG-motif) and ABA (ABRE and ARE). Looking for  
365 evolutionary pattern in these cis-acting elements, we performed hierarchical clustering on principal

366 components (HCPC) using FactMineR-package. The HCPC grouped the genes into three clusters  
 367 (Additional file 1: Figure S11).

368 Table 1. Number of genes having MeJA and ABA responsiveness elements in their promoter sequence.

| Clusters  | TGACG-<br>motif | CGTCA-<br>motif | ABRE | ARE | Number of SPXs of<br>each species                                              | Total |
|-----------|-----------------|-----------------|------|-----|--------------------------------------------------------------------------------|-------|
| Cluster 1 | 57              | 57              | 59   | 72  | 16 At, 27 Gm, 12 Mt,<br>15 Pv, 11 Pp, 1 CHb, 2<br>Gsu, 4 Nc, 2 Pp, 1 Mp,       | 91    |
| Cluster 2 | 55              | 55              | 32   | 47  | 5 CHLRE, 2Gsu, 7Mp,<br>13 Ps, 2 CHb, 7 Nc, 12<br>Pp, 3 Sm, 2 Mt, 3 Gm, 3<br>At | 59    |
| Cluster 3 | 12              | 12              | 11   | 12  | 3 Pp, 1 Mp, 1 Sm, 1 At,<br>6 Ps,                                               | 12    |

369  
 370 Almost all SPXs from the current angiosperms fell into cluster 1 along with 2 SPXs of *G.*  
 371 *sulphuraria* and few SPXs from basal angiosperms (Table 1, Additional file 1: Figure S11). Cluster  
 372 2 comprised mostly genes from basal angiosperms and few members of the current angiosperms,  
 373 as well as all SPXs of *C. reinhardtii* and two SPXs from *G. sulphuraria*. Cluster 3, the smallest  
 374 cluster, had 12 genes mostly from *P. patens* and just one SPX of the current angiosperms,  
 375 *AtPHO1;H5*. Trying to find an evolutionary pattern across these clusters, we found out that they  
 376 showed different frequencies of two MeJA responsive elements, TGACG and CGTGA motifs, that  
 377 in cluster 3 all genes, in cluster 2 around 93%, and in cluster 1 only around 62% of genes possessed

378 these two elements (Table 1). Besides, we extracted the most enriched CREs in each cluster to  
379 visualize frequencies of these elements across clusters. As can be seen in the Additional file 1:  
380 Figure S12, CREs involved in the developmental processes (CCGTCC motif, CCGTCC box, A-  
381 box) and stress response (DRE core, MYB recognition site, CCAT box) were significantly higher  
382 in cluster 2 than in the other clusters. Cluster 1 had higher frequency of two hormone responsive  
383 elements, TCA (salicylic acid responsive elements) and ERE (Ethylene-responsive elements) in  
384 comparison to the other clusters. Overall, it seems that during the evolution of angiosperms, SPX  
385 promoters were enriched by stress responsive elements and hormonal responsive elements,  
386 especially ERE and TCA.

387

### 388 **Selective pressure and SPX history model in legumes**

389 The Ks (number of synonymous substitutions per synonymous site) and Ka (number of  
390 nonsynonymous substitutions per nonsynonymous site) values of pairs of segmental duplicated  
391 SPX genes in soybean, *M. truncatula* and common bean were retrieved from Plant Genome  
392 Duplication Database (PGDD) (Supplemental Table S5). The Ka/Ks ratios < 1 indicate purifying  
393 selection and Ka/Ks values > 1 indicate positive selection [42, 43]. The Ka/Ks values for all pairs  
394 of segmental duplicated genes were < 0.3 implying an intense purifying selection on these gene  
395 pairs (Supplemental Table S5). In addition, the Ka/Ks ratio of duplicated gene pairs between  
396 soybean and *M. truncatula*, soybean and common bean, and *M. truncatula* and common bean were  
397 retrieved (Supplemental Table S5). The mean Ka/Ks values of 0.18, 0.16, and 0.14, respectively,  
398 suggest that the genetic pairs between species were subjected to purifying selection.

399 Based on the  $K_s$  values of duplication blocks retrieved from PGDD, the divergence times were  
400 estimated. In total, 36, 7, and 3 duplication blocks were retrieved for soybean, *M. truncatula*, and  
401 common bean, respectively (Supplemental Table S5). All duplication blocks related to MFS and  
402 RING class have  $K_s < 1.5$ , and the most recent duplication events belonged to MFS members in  
403 soybean. Evolutionary process of GmSPX genes was modeled based on  $K_s$  of duplication blocks  
404 (Figure 6). The duplicated SPX genes in SPX, EXS, MFS, and RING were classified into 3, 2, 2,  
405 and 1 groups, respectively. GmSPX-A firstly generated three copies after the Gamma WGT event,  
406 followed by loss of one copy. The two retained copies were further doubled after Legume WGD  
407 event, and after losing one copy, the rest three copies duplicated after Glycine WGD event,  
408 resulting in genes, GmSPX8, GmSPX7, GmSPX3, GmSPX4, and GmSPX2. GmSPX3 lost its  
409 linked duplicated gene (Figure 6). Unexpectedly, all three generated copies of GmSPX-EXS-A in  
410 Gamma WGT event were retained but their duplicated genes after Legume WGD were lost.  
411 Therefore, Glycine WGD resulted in generation of five genes (*GmSPX-PHO1;10*, *GmSPX-*  
412 *PHO1;5*, *GmSPX-PHO1;3*, *GmSPX-PHO1;9*, and *GmSPX-PHO1;6*) after a loss of one of the  
413 linked genes. However, GmSPX-EXS-B lost one copy in the first and second round of duplication  
414 events and lastly generated six genes (*GmSPX-PHO1;1*, *GmSPX-PHO1;4*, *GmSPX-PHO1;14*,  
415 *GmSPX-PHO1;8*, *GmSPX-PHO1;7*, *GmSPX-PHO1;2*). *GmSPX-B* and *-C* as well as *GmSPX-*  
416 *MFS-B* shared the same evolutionary trajectory and generated two duplicated genes in the same  
417 way after three rounds of the evolution processes. In addition, *GmSPX-MFS-A* and *GmSPX-RING*  
418 were somewhat similar as both produced two duplicated blocks, although one copy was lost in  
419 *GmSPX-RING*, resulting finally in three and four genes, respectively.

420

421

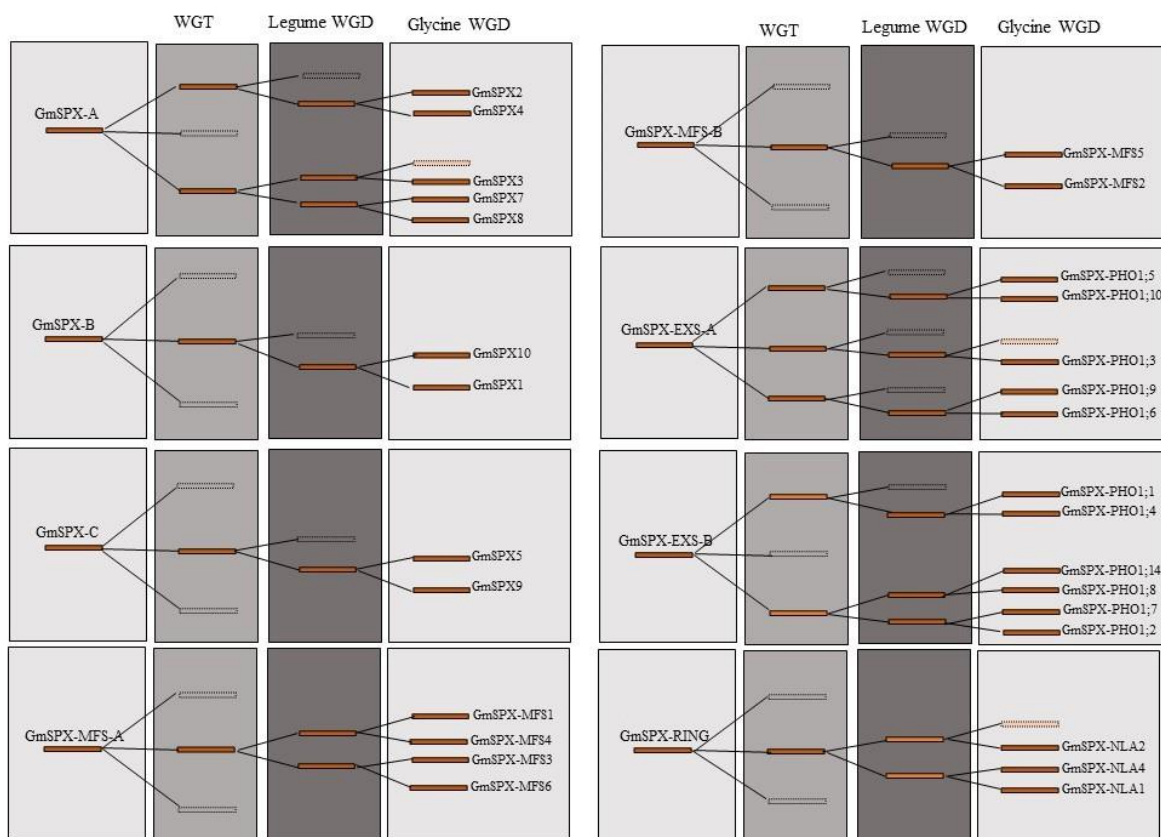

422

423 Figure 6. The evolutionary history of GmSPX genes. The reserved and lost blocks in the corresponding evolution are displayed by  
 424 solid and empty blocks, respectively.

425

## 426 Functional characterization of orthologous genes in legumes

427 Orthologs and orthogroups among seven current angiosperms were determined with OrthoFinder.

428 Altogether, from 218 genes, 216 genes could be classified in seven orthogroups and just two genes

429 of rapeseed (*BnaA6.PHO1;H3c* and *BnaA9.PHO1;H3b*) were not grouped, maybe suggesting a

430 brassica-specific function for these proteins. All members of SPX, SPX-MFS, and SPX-RING

431 were assigned into one group; 1, 3, and 4, respectively. On the other hand, members of EXS family

432 were divided into four distinct groups: group 2 that was dicot-specific; group 7, brassicaceae-



433 specific; as well as groups 5 and 6 that contained genes from all species (Table 2). All genes in an  
434 orthogroup are descended from a single ancestral gene.

435 Table 2. Ortholog groups among soybean, common bean, Medicago, Arabidopsis, rice, wheat, and brassica.

| Orthogroup | Pv | Gm | Ath | Bna | Os | Ta | Mt | Total |                                     |
|------------|----|----|-----|-----|----|----|----|-------|-------------------------------------|
| 1          | 4  | 10 | 4   | 11  | 5  | 15 | 5  | 54    | SPX group                           |
| 2          | 4  | 8  | 8   | 29  | 0  | 0  | 4  | 53    | SPX.EXS dicot-specific group        |
| 3          | 3  | 6  | 3   | 8   | 4  | 12 | 3  | 39    | SPX.MFS group                       |
| 4          | 3  | 4  | 2   | 7   | 2  | 7  | 4  | 29    | SPX.RING group                      |
| 5          | 2  | 4  | 1   | 4   | 1  | 9  | 2  | 23    | SPX.EXS group                       |
| 6          | 1  | 2  | 1   | 5   | 2  | 3  | 1  | 15    | SPX.EXS group                       |
| 7          | 0  | 0  | 1   | 2   | 0  | 0  | 0  | 3     | SPX.EXS brassicaceae-specific group |

436

437 Orthologous genes across Arabidopsis and the three legume crops are presented in Table 3. Some  
438 genes showed a simple one-to-one orthology relationship, such as *GmSPX6*, *PvSPX2*, and *MtSPX5*  
439 with *AtSPX4*; *GmPHO1;3*, *PvPHO1;1*, and *MtPHO1;4* with *AtPHO1;H10*; and *GmNLA3*,  
440 *PvNLA1*, and *MtNLA2* with *AtNLA2*. Others showed one-to-many and many-to-many orthology  
441 relationships. Interestingly, the pattern of *AtSPXs* orthology relationships were the same among  
442 three legumes, and each SPX gene has the same evolutionary trajectories. To overcome the  
443 difficulty of one-to-many and many-to-many orthology inference, expressologs of *AtSPXs* with  
444 soybean and Medicago were retrieved from the Expression Tree Viewer [32]. Expression Tree  
445 Viewer allows to visualize expressologs depending on both sequence similarity and expression

446

447 Table 3. Ortholog genes between legumes and Arabidopsis.

| Arabidopsis         | Soybean              | Common bean | Medicago     |
|---------------------|----------------------|-------------|--------------|
| AtSPX1/2            | GmSPX3/7/8           | PvSPX1/5    | MtSPX4       |
| AtSPX3              | GmSPX1/10            | -           | MtSPX3       |
| AtSPX4              | GmSPX6               | PvSPX2      | MtSPX5       |
| AtPHO1              | GmPHO1;2/7/8/14      | PvPHO1;6/5  | MtPHO1;1/2   |
| AtPHO1;H1           | GmPHO1;1/4           | PvPHO1;4    | MtPHO1;7     |
| AtPHO1;H2/3/4/5/7/8 | GmPHO1;5/10/11/12/13 | PvPHO1;2/3  | -            |
| AtPHO1;H9           | GmPHO1;6/9           | PvPHO1;7    | MtPHO1;3/5/6 |
| AtPHO1;H10          | GmPHO1;3             | PvPHO1;1    | MtPHO1;4     |
| AtMFS1/2/3          | GmMFS1/2/3/4/5/6     | PvMFS1/2/3  | MtMFS1/2/3   |
| AtNLA/AtBAH1        | GmNLA1/2/4           | PvNLA2/3    | MtNLA1/3/4   |
| AtNLA2              | GmNLA3               | PvNLA1      | MtNLA2       |

448

449 pattern similarity. Implementing this web tool resulted in postulating expressologs between  
 450 Arabidopsis and soybean and Medicago (Supplemental Table S6). Generally, the results were in  
 451 very good agreement with previous results from phylogenetic tree and OrthoFinder. Based on the  
 452 Expression Tree Viewer results, we could designate *GmPHO1;2/7* and *MtPHO1;1/2* as the  
 453 functional orthologs of *AtPHO1* and *AtPHO1;H1* with the function of long-distance Pi transport.  
 454 However, it was difficult to find expressologs for other SPXs. Consistently, the function of

455 *GmSPX1* [31] and *GmSPX3* [29] were characterized with negative and positive regulatory roles in  
456 phosphate deficiency that are the same for *AtSPX1/2* and *AtSPX3* [6].

### 457 **Expression analysis of SPXs in Arabidopsis and soybean**

458 SPX genes are involved in various physiological process but they are specifically known for their  
459 role in phosphate signaling and phosphate homeostasis. To get insight into the potential  
460 developmental roles and preferential tissue expression, we analyzed a raw RNA-seq dataset from  
461 different developmental stages of different soybean tissues (PRJNA238493). We profiled the  
462 *GmSPXs* expression across 17 different samples (Additional file 1: Figure S13). Overall, we  
463 observed different expression patterns of *GmSPXs* in various developmental stages of different  
464 tissues, indicating a functional divergence in each class of *GmSPXs* [27, 44]. For example,  
465 *GmMFS2/5* and *GmPHO1;2/7* showed the same expression in almost all samples but were  
466 preferentially expressed in leaf and root, respectively. It can be concluded that they are not  
467 involved in the developmental processes. On the other hand, duplicated gene pairs arising from  
468 Glycine-specific WGD showed very similar expression patterns across all the samples, especially  
469 the *GmMFS2/5* gene pair, but except *GmSPX5/9* and *GmPHO1;5/10* pairs. Taking together, both  
470 groups of duplicated genes with the same or different expression pattern showed the evidence of  
471 sub-functionalization during the soybean evolution [44].

472 In order to gain insight how individual SPX genes are regulated by Pi deficiency, we analysed  
473 publicly available RNAseq dataset (PRJNA544698) [45] and used DPGP software to cluster genes  
474 with similar response patterns. DPGP clustering revealed 6 and 4 clusters for root (Additional file  
475 1: Figure S14) and leaf (Additional file 1: Figure S15), respectively. We designated names for  
476 each cluster based on their patterns; up-reg-fast (cluster 3 in root and cluster 1 in leaf), down-reg-  
477 fast (cluster 2 in root and cluster 3 in leaf), the lowest-peak-T1 (cluster 6 in root), the lowest-peak-

478 T2 (cluster 5 in root), the highest-peak-T1 (cluster 1 in root), up-reg-slow (cluster 4 in leaf), and  
479 the highest-peak-T2 (cluster 4 in root and cluster 2 in leaf). As can be seen in the Table 4, some  
480 genes have opposite pattern of regulation in different tissues. To exemplify, *GmSPX1* was placed  
481 in down-reg-fast in root and up-reg-fast in leaf, *GmSPX-PHO1;10* is found in the highest-peak-T1  
482 in root and the highest-peak-T2 in the leaf, while *GmSPX6*, *GmSPX-NLA1*, and *GmSPX-NLA3*  
483 were in the lowest-peak-T2 cluster in root and the highest-peak-T2 in leaf. The homologs of  
484 *AtPHO1* and *AtPHO1;H1(PHO1;2/7/14)* showed an up-reg-fast pattern of cluster 4 in root and the  
485 highest-pick-T2 in clusters 2 leaf. Supporting these patterns, He et al. (2013) reported similar  
486 expression pattern for these genes, however, there is no clear association between increasing  
487 mRNA level of these genes in leaves during phosphate deficiency and growth or shoot Pi content  
488 [15]. Overall, for the genes which show tissue-specific expression, we observed different patterns  
489 in root and shoot in response to phosphate deficiency.

490 Finally, after investigating developmental and dynamical expression patterns of *GmSPX*, we used  
491 another RNA-seq dataset from Arabidopsis and soybean to examine the expression of *SPXs* in  
492 three different zones of root [46]. The original data were generated in multiple species, however,  
493 we only used RPKM values from Arabidopsis and soybean. A general comparison showed that  
494 almost all *SPX* tended to group species-based rather than orthology-based, except *AtPHO1* and  
495 *AtPHO1;H1* which clustered with their orthologs, *GmPHO1;2* and *GmPHO1;7* (Additional file 1:  
496 Figure S16). Thus, we can conclude that the tissue-specific genes pose difficulty to identify  
497 functional orthologs because of probable tissue inequivalences among species.

498

499

500 Table 4. Different patterns of clusters in root and leaf in the time series dataset of soybean.

| Patterns               | Root clusters                                                                                                 | Leaf clusters                                                                                                                                                                                          |
|------------------------|---------------------------------------------------------------------------------------------------------------|--------------------------------------------------------------------------------------------------------------------------------------------------------------------------------------------------------|
| <b>up-reg-fast</b>     | <b>Cluster3:</b> <i>SPX4, SPX.PHO1;2,</i><br><i>SPX.PHO1;7, SPX.PHO1;8, SPX.PHO1;14,</i><br><i>SPX.PHO1;6</i> | <b>Cluster1:</b> <i>SPX1, SPX.MFS6,</i><br><i>MFS-NLA2, MFS-NLA4,</i><br><i>SPX.PHO1;11</i>                                                                                                            |
| <b>down-reg-fast</b>   | <b>Cluster2:</b> <i>SPX1, SPX10, SPX5, SPX.MFS4,</i><br><i>SPX.NLA2, SPX.NLA4, SPX.PHO1;12</i>                | <b>Cluster3:</b> <i>SPX2, SPX.MFS2,</i><br><i>SPX.MFS5, SPX.MFS4</i>                                                                                                                                   |
| <b>up-reg-slow</b>     |                                                                                                               | <b>Cluster4:</b> <i>SPX4, SPX5,</i><br><i>SPX.PHO1;1, SPX.PHO1;4,</i><br><i>SPX.PHO1;6, SPX.PHO1;9</i>                                                                                                 |
| <b>highest-peak-T1</b> | <b>Cluster1:</b> <i>SPX.MFS1, SPX.PHO1;5,</i><br><i>SPX.PHO1;10, SPX.PHO1;9, SPX.PHO1;1</i>                   |                                                                                                                                                                                                        |
| <b>highest-peak-T2</b> | <b>Cluster4:</b> <i>SPX.MFS5, SPX.PHO1;4,</i><br><i>SPX.PHO1;11</i>                                           | <b>Cluster2:</b> <i>SPX3, SPX6, SPX7,</i><br><i>SPX8, SPX10, SPX.NLA1,</i><br><i>SPX.NLA3, SPX.PHO1;2,</i><br><i>SPX.PHO1;7, SPX.PHO1;14,</i><br><i>SPX.PHO1;5, SPX.PHO1;10,</i><br><i>SPX.PHO1;12</i> |
| <b>lowest-peak-T1</b>  | <b>Cluster6:</b> <i>SPX3, SPX7, SPX8, SPX.MFS2,</i><br><i>SPX.MFS6</i>                                        |                                                                                                                                                                                                        |
| <b>lowest-peak-T2</b>  | <b>Cluster5:</b> <i>SPX6, SPX.NLA1, SPX.NLA3</i>                                                              |                                                                                                                                                                                                        |

501

502

503

504

## 505 **Discussion**

506 The role of SPX domain-containing proteins in Pi homeostasis in Arabidopsis, rice, rapeseed, and  
507 wheat and to some extent in soybean and common bean were studied previously [3, 13, 27, 29-31,  
508 35]. While an evolutionary analysis of SPX-EXS [47] and SPX-MFS [24] classes has been  
509 reported, as far as we know, the evolution of all classes of SPX gene family from algae to higher  
510 plants has not been explored. In addition, despite legume crops requiring a relatively high amount  
511 of P, no systematic study of SPX gene family has been reported in legume crops. To close this  
512 knowledge gap, we performed a comprehensive search for SPX genes throughout three legume  
513 crops, including soybean, *M. truncatula*, and common bean and also algae, liverwort, hornwort,  
514 and basal angiosperms to figure out how this gene family originated and expanded during the  
515 evolution as well as to identify SPX functional orthologs in legumes.

### 516 **Evolutionary conservation and divergence of SPX gene family from algae to legumes**

517 Proteins harboring SPX domain has been reported to form four classes based on their domains.  
518 Meanwhile, some other classes have been revealed in the basal plants and algae such as SPX-SLC  
519 and SPX-VTC [24]. Here we report other functional protein domains being fused to SPX domains,  
520 including EIN3, S6PP, EIN3-S6PP, and Kelch in *S. moellendorffii*, CitMHS in *C. crispus*,  
521 Na\_sulph\_symp in *G. sulphuraria* and *C. reinhardtii*, BET (Bromodomain extra-terminal-  
522 transcription regulation) in *P. somniferum*, EXS.rve in *C. braunii*, and Sugar\_tr in *M. polymorpha*.  
523 Interestingly, some of these new domains have been lost in the land plants and all of them in  
524 angiosperms. Domains present in algae before land colonization probably had specific functions  
525 that are not required for land plants. For example, SPX-SLC and SPX-VTC were reported in algae

526 that store polyP and are thus lost in plants with Pi vacuole storage, which in turn gained SPX-MFS  
527 [24]. Among all assayed species, *S. moellendorffii* showed the most variation of SPX genes, which  
528 could be due to its special ability of resurrection. Moreover, unlike other SPX proteins, SPX  
529 domain are located at C terminal in S6PP-SPX, EIN3-S6PP\_C-SPX, EIN3-SPX, and Kelch-SPX  
530 classes. The function of other fusion proteins is unknown so far. Particularly interesting are the  
531 fusions of SPX with EIN3 domains, because in Arabidopsis EIN3 is directly involved in regulation  
532 of phosphate homeostasis through binding to promoter of *PHR1* [48]. The SPX domain would then  
533 add another level of control for this interaction and allow the reciprocal regulation of ethylene  
534 signaling by phosphate. Similarly, Kelch domains are often found in regulatory proteins, for  
535 example fused to F-Box proteins [49], hence, again, the fusion with SPX may connect multiple  
536 regulatory circuits. If the SPX domain enables the activities of the additional domains to be  
537 modulated by phosphate (or InsPP), this offers an intriguing opportunity for using these domains  
538 in synthetic biology approaches to make various cellular processes controlled by phosphate. These  
539 hypotheses, however, have to be verified. On the other hand, RING and MFS classes have  
540 gradually appeared in the later-diverging plants. MFS and then RING class have the least  
541 fluctuations from 1 to 6 genes. In contrast, EXS class had high variation of gene numbers in each  
542 species and also the highest number of identified genes in comparison with the other classes. Also,  
543 presence of this domain in whole Eukarya except algae, suggest that it has been lost in some algae.  
544 The number of whole-genome duplications is correlated with gene family size [47, 50], which is  
545 consistent with our results, since *P. somniferum* and *G. max* with two WGD events had the largest  
546 sizes of SPX family [51, 52]. The expansion of SPX family in these two plants is mostly affected  
547 by WGD duplication type, while segmental/local duplication type was the main contributor of  
548 expansion in *S. moellendorffii*, the species with third greatest SPX family, which might explain its

549 unique classes. Algae possess 2 to 5 SPX gene family members. The expansion in *P. patens* (22  
550 members), could suggest that duplications took place after plant terrestrialization as the SPX  
551 proteins became more important [53].

552 The phylogenetic analysis brought some unexpected findings. First, it showed three clades for 4  
553 subfamilies; SPX and EXS in two different clades, but MFS and RING classes diverged from the  
554 same ancestor. Second, SPXs from algae did not group with other species in any clade, except of  
555 SPX-I. It can be concluded that genes in the SPX-I sub-clade are the most ancient genes in  
556 angiosperms that were diverged from the same ancestor with green algae. Hence, *AtSPX4*,  
557 *GmSPX6*, *MtSPX5*, *PvSPX2*, and *OsSPX4* probably have the same function with their ancestral  
558 orthologs in the green algae, but the genes in two other sub-clades, SPX-II and SPX-III have  
559 evolved after divergence of streptophytes and chlorophytes and might have acquired additional  
560 functions. *AtSPX4* and *OsSPX4* have indeed the same function and mechanism in regulation of  
561 PSI, as in presence of phosphate both proteins interact in the cytosol with the corresponding key  
562 regulators *AtPHR1* and *OsPHR2*, and prevent them from translocating to nucleus [11, 54]. During  
563 P deficiency they are rapidly degraded, releasing thus the PHR factors to induce transcription of  
564 PSI genes. The two proteins however, also differ, as while *OsSPX4* integrates nitrate and  
565 phosphate signaling, *AtSPX4* does not seem to have this function, but on the other hand integrates  
566 phosphate signaling and anthocyanin biosynthesis [11, 55].

567 The MFS class as the most recently diverged class of SPX proteins was divided into two sub-  
568 clades, with MFS-I specifically containing monocots, suggesting that MFS genes in monocots  
569 diversified differently in comparison with basal angiosperms and eudicots. This may be due to  
570 different Pi storage between monocots and eudicots [6, 56, 57]. While monocots store P  
571 preferentially in the roots and their leaves have the highest P concentration in the mesophyll cells,



572 eudicots store much more P in the leaves with the highest concentration in the epidermis [56]. It  
573 is thus possible that the different cellular localization drove a different evolution of SPX-MFS  
574 genes between monocots and dicots. Modern RING class genes have evolved two times, RING-I  
575 clade arose from a duplication of the common ancestor of mosses and angiosperms and RING-II  
576 arose from duplication of the common ancestor of lycophytes, liverwort and angiosperms. In the  
577 EXS class, EXS-III clade did not contain any orthologs from monocots but interestingly, many  
578 *AtPHO1* genes such as *AtPHO1;H2/3/4/5/6/7/8* grouped specifically with the genes from *Brassica*  
579 *napus*, suggesting special functions in Brassicaceae. Only *AtPHO1;H9* and *AtPHO1;H10* had two  
580 and one orthologs in the legumes, respectively.

581 Based on collinearity analyses, species with more WGD events showed more inter-species  
582 collinearity, but *S. moellendorffii* with locally expanded SPX and rice with mostly dispersed  
583 expanded SPX just showed intra-genome collinearity. Low collinear relationship between rice and  
584 eudicots was reported previously [58] and explained by longer evolutionary distance and more  
585 genome rearrangements [59] as well as the erosion of macrosynteny between monocots and dicots  
586 [60]. Our results are consistent with the monocot paleopolyploidy after their divergence from  
587 eudicots [58]. Having collinear relationship can arise from paleopolyploidy in the common  
588 ancestor, but *S. moellendorffii* has no evidence for WGD events and its intra-genome collinear  
589 blocks arose from segmental/local duplication [37].

## 590 **Functional characterization of SPXs in legumes**

591 Due to the functional conservation of proteins across species, determination of orthologous  
592 relationships can provide useful insights about the biological role of these proteins [61]. As plants  
593 have undergone various duplication events and had different evolutionary trajectories, relating  
594 same functions to the orthologs are difficult, especially there are one-to-many or many-to-many

595 orthologous relationships [32]. Therefore, two different methods, phylogenetic inference of  
596 orthologs from protein sequences and expressolog identification, were conducted for prediction of  
597 functional orthologs of SPXs. This was necessary because, firstly, there are complex orthology  
598 relationships among some SPX genes that prevented Orthofinder to detect the exact functional  
599 orthologs and, secondly, some SPX genes show tissue-expression pattern that can pose problem to  
600 identify expressologs, due to difficulties in assignment of tissue equivalencies between legumes  
601 and Arabidopsis. In the dynamic *GmSPX* expression patterns, we observed tissue-specificity for  
602 most of *GmSPXs* except for homologs of *AtPHO1* and *AtPHO1;H1*. Taking together, we could  
603 assign functions of *AtSPX4*, *AtPHO1;H10* and *AtNLA2* to their predicted orthologs from  
604 Orthofinder and *AtPHO1* and *AtPHO1;H1* to their orthologs from expressolog identification  
605 results. To examine this conclusion, we analyzed two different datasets of soybean to profile  
606 *GmSPXs* expression in different tissues and developmental stages as well as their dynamic  
607 expression responses to Pi deficiency in leaf and root. Overall, we found that almost all *GmSPXs*  
608 except *GmPHO1;2/7* and *GmMFS2* have different expression patterns across the developmental  
609 samples as well as in root and leaf responses to the dynamic Pi deficiency. In summary, these  
610 transcriptome analyses highlighted that *GmSPX* genes might be involved in different  
611 developmental processes and stresses beyond phosphate starvation response. It is probable that  
612 new or sub-functionalization in soybean and generally in legumes took place with the new  
613 functions of SPX proteins waiting to be discovered. Our analyses lay a solid foundation for the  
614 future functional studies of SPX proteins from algae to legumes.

## 615 **Conclusion**

616 In conclusion, we comprehensively analyzed SPX gene family evolution and dissected how  
617 different protein motifs and Cis-acting elements evolved, as well as identified expansion patterns,

618 and collinear gene blocks during evolution from algae to angiosperms. Afterwards, focusing on  
619 legumes, we tried to model evolutionary history of SPXs in soybean and identify functional  
620 orthologs. We could predict the putative SPX proteins involved in long-distance Pi transportation  
621 in soybean and *Medicago*. Our study not only provides a global view of the evolution and  
622 expansion of *SPX* gene family in important species but also provides the first step for more detailed  
623 investigations of the functions of individual *SPXs* in legumes.

## 624 **Material and methods**

### 625 **Bioinformatic identification of SPX proteins**

626 In order to identify SPX domain-containing proteins in our species; legume crops (soybean –  
627 *Glycine max*, alfalfa – *Medicago truncatula*, and common bean – *Phaseolus vulgaris*), mosses  
628 (*Physcomitrella patens*), liverwort (*Marchantia polymorpha*), Rhodophytes (*Cyanidioschyzon*  
629 *merolae*, *Galdieria sulphuraria*, and *Chondrus crispus*), chlorophytes (*Chlamydomonas*  
630 *reinhardtii* and *Ostreococcus lucimarinus*), charophytes (*Chara braunii*), basal angiosperms  
631 (*Papaver somniferum*, *Amborella trichopoda*, and *Nymphaea colorata*), and lycophytes  
632 (*Selaginella moellendorffii*), full-length protein sequences of AtSPXs were used for BLASTP  
633 searches across proteomes of the above mentioned species. After removing redundant sequences,  
634 the SPX proteins obtained through BLASTP search were investigated for the presence of  
635 additional domains along with SPX domain using SMART [62], Pfam [63], Conserved Domain  
636 Database (CDD) [64], and PROSITE [65] databases.

637 The sequences of identified SPX proteins in the three legume crops were analyzed for their  
638 physiochemical properties; including isoelectric point (pI), molecular weight (Mw), instability  
639 index (II), grand average of hydropathicity (GRAVY), and aliphatic index (AI) using ProtParam

640 tool of ExPASy website (<https://web.expasy.org/protparam/>). Subcellular location prediction was  
641 conducted using Wolf Psort [66].

### 642 **Phylogeny analysis and identification of conserved motifs**

643 The amino acid sequences of identified SPX proteins in our surveyed species and Arabidopsis as  
644 reviewed in [6], rice [6], wheat [3], and *Brassica napus* [27] were downloaded from EnsemblPlants  
645 (<https://plants.ensembl.org/index.html>). Three sequences to be used as outgroup, XPR1 from  
646 human and mouse, and SYG1 from *C. elegans*, were downloaded from NCBI database  
647 (<https://www.ncbi.nlm.nih.gov/>). Multiple sequence alignment of these full-length sequences was  
648 performed by ClustalX (ver. 2.1; <http://www.clustal.org/>). Then, we used Maximum Likelihood  
649 method and JTT matrix-based model in MEGA 7 software to build a phylogenetic tree from the  
650 sequence alignment using following parameters: p-distance model, partial deletion and 1000  
651 bootstraps. To predict conserved motifs of SPX proteins across all species, as well as Arabidopsis  
652 and rice, MEME (<http://meme-suite.org/tools/meme>) tool with the maximum number of motifs 20  
653 was used. Logo sequences of conserved motifs were obtained by Weblogo 3  
654 (<http://weblogo.threeplusone.com/>).

### 655 **Collinearity analysis and gene expansion pattern of SPX from algae to eudicots**

656 In order to get insight about how collinear blocks have been conserved during the evolution, we  
657 performed collinearity analysis three times with different species; 1. Among three legume crops,  
658 Arabidopsis, rice, *P. somniferum*, and *N. colorata*, 2. Among *S. moellendorffii*, *P. patens*, *N.*  
659 *colorata*, and *A. trichopoda*, and 3. Among three legume crops using MCSscanX toolkit [67] to get  
660 collinear gene blocks and also duplication types by duplicate\_gene\_classifier program. To  
661 visualize the collinear blocks among the first and third runs, tbtools was used [68]. Because of

662 non-chromosomal reference genomes in *P. patens* and *S. moellendorffii* we just retrieved their  
663 collinear gene blocks without visualization.

#### 664 **Selective pressure and evolutionary models of SPX genes in the legume crops**

665 Duplication blocks between each two species of soybean, common bean and *M. truncatula* were  
666 retrieved from the Plant Genome Duplication Database (PGDD,  
667 <http://chibba.agtec.uga.edu/duplication/>). SPX gene blocks were manually extracted and used for  
668 further analyses. The selective pressure on duplicated genes were estimated by retrieving  
669 synonymous ( $K_s$ ) and non-synonymous ( $K_a$ ) per site between the duplicated gene-pairs using from  
670 PGDD database. The  $K_a/K_s$  ratio was assessed to determine the molecular evolutionary rates of  
671 each gene pair. Generally, the  $K_a/K_s < 1$  indicates purifying selection,  $K_a/K_s > 1$  indicates positive  
672 selection, and  $K_a/K_s = 1$  indicates neutral selection. The divergence time of the duplication blocks  
673 was evaluated to investigate the evolution of GmSPX genes. If the  $K_s > 1.5$ , the divergence time  
674 is after the Gamma whole-genome triplication (WGT); if the  $K_s < 0.3$ , the divergence time is after  
675 the Glycine whole-genome duplication (WGD) event; and when the  $K_s$  is between 0.3 and 1.5, the  
676 divergence time is after legume WGD event but before the Glycine WGD event [69, 70].

#### 677 **Identification of Cis-acting-elements in the promoters of SPX gene family**

678 For finding evolutionary pattern of Cis-acting-elements from algae to eudicots, 1500 bp upstream  
679 from the start codon of SPX genes in all assayed species and Arabidopsis were downloaded from  
680 the EnsemblPlants and analyzed using the PlantCARE database  
681 (<http://bioinformatics.psb.ugent.be/webtools/plantcare/html/>). Afterwards, SPX genes were  
682 clustered with hierarchical clustering on principal components (HCPC) method by FactMineR

683 package. All detected cis-acting elements were merged into one matrix with 1 and 0 values for  
684 present or absent elements in each promoter, respectively.

### 685 **Prediction of functional orthologs of AtSPXs across legumes**

686 To identify functional orthologs in the three legumes, we used OrthFinder to compare SPX genes  
687 among 7 species (rice, wheat, rapeseed, Arabidopsis, *M. truncatula*, soybean, and common bean),  
688 resulting in orthogroups and orthologs based on sequence similarities [71]. Then, to overcome the  
689 weakness of sequence-based ortholog identification for one-to-many and many-to-many orthologs,  
690 expressolog identification among Arabidopsis, soybean, and Medicago  
691 ([http://bar.utoronto.ca/expressolog\\_treeviewer/cgi-bin/expressolog\\_treeviewer.cgi](http://bar.utoronto.ca/expressolog_treeviewer/cgi-bin/expressolog_treeviewer.cgi)), was used.

### 692 **Expression analysis of SPX genes**

693 Three different expression analyses were performed as follows:

- 694 1. To compare tissue and developmental expression pattern of *GmSPXs*, RNA-seq data of 17  
695 samples from different tissues (flower, root, shoot meristem, seed, and leaves) in five  
696 developmental stages (germination, trefoil, flowering, seed development, and plant  
697 senescence) (PRJNA238493) [72] were analyzed. The gene expression profiles were  
698 visualized by heatmap using R package pheatmap (<https://www.r-project.org/>).
- 699 2. To visualize changes in *GmSPX* gene expression in response to P deficiency we used  
700 publicly available dataset (PRJNA544698) [45]. The data were reanalyzed and TPM  
701 (Transcript Per Million) values were calculated from samples over different time points of  
702 Pi deficiency, including early stress (T, 24 h), recovery (TC, 24 h deficiency, 48 h  
703 resupply), and repeated stress (TCT, additional 24 h deficiency) in root and leaf tissues.

704 The data were clustered using the Dirichlet process with Gaussian process mixture model  
705 (DPGP) [73].

706 3. To assess if the predicted functional orthologs in Arabidopsis and soybean show the same  
707 expression in different root development zones, including meristemic zone (MZ),  
708 elongation zone (EZ), and differentiation zone (DZ) data from [46] have been used. RPKM  
709 values for the *SPXs* were collected (GSE64665), and  $\log_2(\text{RPKM} + 1)$  was used to  
710 construct correlation heatmap using the pheatmap package (<https://www.r-project.org/>).

## 711 **Declarations**

### 712 **Ethics approval and consent to participate**

713 Not applicable

### 714 **Consent for publication**

715 Not applicable

### 716 **Availability of data and materials**

717 The datasets generated and/or analyzed during the current study are included in the supplemental  
718 material.

### 719 **Competing interests**

720 The authors declare no competing interests

### 721 **Funding**

722 Research in SK's lab is funded by the Deutsche Forschungsgemeinschaft (DFG) under Germany's  
723 Excellence Strategy – EXC 2048/1 – project 390686111.

724 **Authors' contributions**

725 MNC, AN, EE, and SK designed the study. MNC performed the analyses. Assisted with  
726 interpretation. MNC wrote the manuscript. All authors reviewed the manuscript. The authors read  
727 and approved the final manuscript.

728 **Acknowledgements**

729 We acknowledge the Ministry of Science, Research and Technology of Iran and the University of  
730 Shiraz for the exchange scholarship to University of Cologne

731 **Abbreviations**

732 PHR: Phosphate starvation Response  
733 PP-InsPs: inositol pyrophosphates  
734 MFS: Major Facilitator Superfamily  
735 RING: Really Interesting New Gene  
736 NLA: Nitrogen Limitation Adaptation  
737 PSI: Pi starvation-induced  
738 Ein3: Ethylene intensive 3  
739 VTC: vacuolar transporter chaperone  
740 CitMHS: Citrate transporter  
741 Na\_sulph\_symp: sodium sulphate symporter  
742 S6PP\_C: Sucrose-6F-phosphate phosphohydrolase C-terminal  
743 Kelch: Galactose oxidase  
744 rve: Integrase core domain  
745 GRAVY: grand average of hydropathicity  
746 LSC: Lysine Surface Cluster  
747 Gm: Glycine max  
748 Mt: Medicago truncatula



749 Pv: *Phaseolus vulgaris*  
750 Ps: *Papaver somniferum*  
751 Nc: *N. colorata*  
752 At: *Arabidopsis thaliana*  
753 Os: *Oryza sativa*  
754 CRE: cis-acting elements  
755 MeJA: methyl jasmonate  
756 DPGP: Dirichlet process with Gaussian process mixture model  
757 HCPC: hierarchical clustering on principal components  
758 **References**

- 759 1. Richardson AE. Regulating the phosphorus nutrition of plants: molecular biology meeting  
760 agronomic needs. *Plant and soil*. 2009;322(1-2):17-24.  
761 2. Poirier Y, Bucher M. Phosphate transport and homeostasis in *Arabidopsis*. The *Arabidopsis*  
762 book/American Society of Plant Biologists. 2002;1.  
763 3. Kumar A, Sharma M, Gahlaut V, Nagaraju M, Chaudhary S, Kumar A, et al. Genome-wide  
764 identification, characterization, and expression profiling of SPX gene family in wheat. *International journal*  
765 *of biological macromolecules*. 2019;140:17-32.  
766 4. Balyan HS, Gahlaut V, Kumar A, Jaiswal V, Dhariwal R, Tyagi S, et al. Nitrogen and phosphorus  
767 use efficiencies in wheat: physiology, phenotyping, genetics, and breeding. *Plant breeding reviews*.  
768 2016;40:167-234.  
769 5. Misson J, Raghothama KG, Jain A, Jouhet J, Block MA, Bligny R, et al. A genome-wide  
770 transcriptional analysis using *Arabidopsis thaliana* Affymetrix gene chips determined plant responses to  
771 phosphate deprivation. *Proceedings of the National Academy of Sciences*. 2005;102(33):11934-9.  
772 6. Secco D, Wang C, Arpat BA, Wang Z, Poirier Y, Tyerman SD, et al. The emerging importance of  
773 the SPX domain-containing proteins in phosphate homeostasis. *New Phytologist*. 2012;193(4):842-51.  
774 7. Lv Q, Zhong Y, Wang Y, Wang Z, Zhang L, Shi J, et al. SPX4 negatively regulates phosphate  
775 signaling and homeostasis through its interaction with PHR2 in rice. *The Plant Cell*. 2014;26(4):1586-97.  
776 8. Puga MI, Mateos I, Charukesi R, Wang Z, Franco-Zorrilla JM, de Lorenzo L, et al. SPX1 is a  
777 phosphate-dependent inhibitor of Phosphate Starvation Response 1 in *Arabidopsis*. *Proceedings of the*  
778 *National Academy of Sciences*. 2014;111(41):14947-52.  
779 9. Wild R, Gerasimaite R, Jung J-Y, Truffault V, Pavlovic I, Schmidt A, et al. Control of eukaryotic  
780 phosphate homeostasis by inositol polyphosphate sensor domains. *Science*. 2016;352(6288):986-90.  
781 10. Jung J-Y, Ried MK, Hothorn M, Poirier Y. Control of plant phosphate homeostasis by inositol  
782 pyrophosphates and the SPX domain. *Current opinion in biotechnology*. 2018;49:156-62.  
783 11. Hu B, Jiang Z, Wang W, Qiu Y, Zhang Z, Liu Y, et al. Nitrate-NRT1. 1B-SPX4 cascade integrates  
784 nitrogen and phosphorus signalling networks in plants. *Nature plants*. 2019;5(4):401.  
785 12. Wang Z, Hu H, Huang H, Duan K, Wu Z, Wu P. Regulation of OsSPX1 and OsSPX3 on expression  
786 of OsSPX domain genes and Pi-starvation signaling in rice. *Journal of Integrative Plant Biology*.  
787 2009;51(7):663-74.  
788 13. Duan K, Yi K, Dang L, Huang H, Wu W, Wu P. Characterization of a sub-family of *Arabidopsis*  
789 genes with the SPX domain reveals their diverse functions in plant tolerance to phosphorus starvation. *The*  
790 *Plant Journal*. 2008;54(6):965-75.

- 791 14. Hamburger D, Rezzonico E, Petétot JM-C, Somerville C, Poirier Y. Identification and  
792 characterization of the Arabidopsis PHO1 gene involved in phosphate loading to the xylem. *The Plant Cell*.  
793 2002;14(4):889-902.
- 794 15. Stefanovic A, Ribot C, Rouached H, Wang Y, Chong J, Belbahri L, et al. Members of the PHO1  
795 gene family show limited functional redundancy in phosphate transfer to the shoot, and are regulated by  
796 phosphate deficiency via distinct pathways. *The Plant Journal*. 2007;50(6):982-94.
- 797 16. Kang X, Ni M. Arabidopsis SHORT HYPOCOTYL UNDER BLUE1 contains SPX and EXS  
798 domains and acts in cryptochrome signaling. *The Plant Cell*. 2006;18(4):921-34.
- 799 17. Zhou Y, Ni M. SHB1 plays dual roles in photoperiodic and autonomous flowering. *Developmental*  
800 *biology*. 2009;331(1):50-7.
- 801 18. Zhou Y, Zhang X, Kang X, Zhao X, Zhang X, Ni M. SHORT HYPOCOTYL UNDER BLUE1  
802 associates with MINISEED3 and HAIKU2 promoters in vivo to regulate Arabidopsis seed development.  
803 *The Plant Cell*. 2009;21(1):106-17.
- 804 19. Zhou Y, Ni M. SHORT HYPOCOTYL UNDER BLUE1 truncations and mutations alter its  
805 association with a signaling protein complex in Arabidopsis. *The Plant Cell*. 2010;22(3):703-15.
- 806 20. Ribot C, Zimmerli C, Farmer EE, Reymond P, Poirier Y. Induction of the Arabidopsis PHO1; H10  
807 gene by 12-oxo-phytodienoic acid but not jasmonic acid via a CORONATINE INSENSITIVE1-dependent  
808 pathway. *Plant physiology*. 2008;147(2):696-706.
- 809 21. Ribot C, Wang Y, Poirier Y. Expression analyses of three members of the AtPHO1 family reveal  
810 differential interactions between signaling pathways involved in phosphate deficiency and the responses to  
811 auxin, cytokinin, and abscisic acid. *Planta*. 2008;227(5):1025-36.
- 812 22. Lin S-I, Santi C, Jobet E, Lacut E, El Kholti N, Karlowski WM, et al. Complex regulation of two  
813 target genes encoding SPX-MFS proteins by rice miR827 in response to phosphate starvation. *Plant and*  
814 *Cell Physiology*. 2010;51(12):2119-31.
- 815 23. Peng M, Hannam C, Gu H, Bi YM, Rothstein SJ. A mutation in NLA, which encodes a RING-type  
816 ubiquitin ligase, disrupts the adaptability of Arabidopsis to nitrogen limitation. *The Plant Journal*.  
817 2007;50(2):320-37.
- 818 24. Wang L, Jia X, Zhang Y, Xu L, Menand B, Zhao H, et al. Loss of two families of SPX domain-  
819 containing proteins required for vacuolar polyphosphate accumulation coincides with the transition to  
820 phosphate storage in green plants. *Molecular Plant*. 2021;14(5):838-46.
- 821 25. Kopriva S, Chu C. Are we ready to improve phosphorus homeostasis in rice? *Journal of*  
822 *experimental botany*. 2018;69(15):3515-22.
- 823 26. Smýkal P, Coyne CJ, Ambrose MJ, Maxted N, Schaefer H, Blair MW, et al. Legume crops  
824 phylogeny and genetic diversity for science and breeding. *Critical Reviews in Plant Sciences*. 2015;34(1-  
825 3):43-104.
- 826 27. Du H, Yang C, Ding G, Shi L, Xu F. Genome-wide identification and characterization of SPX  
827 domain-containing members and their responses to phosphate deficiency in *Brassica napus*. *Frontiers in*  
828 *plant science*. 2017;8:35.
- 829 28. He L, Zhao M, Wang Y, Gai J, He C. Phylogeny, structural evolution and functional diversification  
830 of the plant PHOSPHATE1 gene family: a focus on *Glycine max*. *BMC evolutionary biology*.  
831 2013;13(1):103.
- 832 29. Yao Z, Tian J, Liao H. Comparative characterization of GmSPX members reveals that GmSPX3 is  
833 involved in phosphate homeostasis in soybean. *Annals of botany*. 2014;114(3):477-88.
- 834 30. Yao Z-F, Liang C-Y, Zhang Q, Chen Z-J, Xiao B-X, Tian J, et al. SPX1 is an important component  
835 in the phosphorus signalling network of common bean regulating root growth and phosphorus homeostasis.  
836 *Journal of experimental botany*. 2014;65(12):3299-310.
- 837 31. Zhang J, Zhou X, Xu Y, Yao M, Xie F, Gai J, et al. Soybean SPX1 is an important component of  
838 the response to phosphate deficiency for phosphorus homeostasis. *Plant Science*. 2016;248:82-91.
- 839 32. Patel RV, Nahal HK, Breit R, Provart NJ. BAR expressolog identification: expression profile  
840 similarity ranking of homologous genes in plant species. *The Plant Journal*. 2012;71(6):1038-50.

- 841 33. Rouached H, Arpat AB, Poirier Y. Regulation of phosphate starvation responses in plants: signaling  
842 players and cross-talks. *Molecular plant*. 2010;3(2):288-99.
- 843 34. Liu N, Shang W, Li C, Jia L, Wang X, Xing G, et al. Evolution of the SPX gene family in plants  
844 and its role in the response mechanism to phosphorus stress. *Open biology*. 2018;8(1):170231.
- 845 35. Secco D, Baumann A, Poirier Y. Characterization of the rice PHO1 gene family reveals a key role  
846 for OsPHO1; 2 in phosphate homeostasis and the evolution of a distinct clade in dicotyledons. *Plant*  
847 *physiology*. 2010;152(3):1693-704.
- 848 36. Yang J, Zhou J, Zhou H-J, Wang M-M, Liu M-M, Ke Y-Z, et al. Global Survey and Expressions  
849 of the Phosphate Transporter Gene Families in Brassica napus and Their Roles in Phosphorus Response.  
850 *International journal of molecular sciences*. 2020;21(5):1752.
- 851 37. VanBuren R, Wai CM, Ou S, Pardo J, Bryant D, Jiang N, et al. Extreme haplotype variation in the  
852 desiccation-tolerant clubmoss *Selaginella lepidophylla*. *Nature communications*. 2018;9(1):1-8.
- 853 38. Zhao T, Holmer R, de Bruijn S, Angenent GC, van den Burg HA, Schranz ME. Phylogenomic  
854 synteny network analysis of MADS-box transcription factor genes reveals lineage-specific transpositions,  
855 ancient tandem duplications, and deep positional conservation. *The Plant Cell*. 2017;29(6):1278-92.
- 856 39. Dewey CN. Positional orthology: putting genomic evolutionary relationships into context.  
857 *Briefings in bioinformatics*. 2011;12(5):401-12.
- 858 40. Bokros N, Popescu SC, Popescu GV. Multispecies genome-wide analysis defines the MAP3K gene  
859 family in *Gossypium hirsutum* and reveals conserved family expansions. *BMC bioinformatics*.  
860 2019;20(2):73-85.
- 861 41. Deokar AA, Tar'an B. Genome-wide analysis of the aquaporin gene family in chickpea (*Cicer*  
862 *arietinum* L.). *Frontiers in plant science*. 2016;7:1802.
- 863 42. Cui L, Feng K, Wang M, Wang M, Deng P, Song W, et al. Genome-wide identification, phylogeny  
864 and expression analysis of AP2/ERF transcription factors family in *Brachypodium distachyon*. *BMC*  
865 *genomics*. 2016;17(1):636.
- 866 43. Lynch M, Conery JS. The evolutionary fate and consequences of duplicate genes. *science*.  
867 2000;290(5494):1151-5.
- 868 44. Zhang Z, Zhao Y, Feng X, Luo Z, Kong S, Zhang C, et al. Genomic, molecular evolution, and  
869 expression analysis of NOX genes in soybean (*Glycine max*). *Genomics*. 2019;111(4):619-28.
- 870 45. O'Rourke JA, McCabe CE, Graham MA. Dynamic gene expression changes in response to  
871 micronutrient, macronutrient, and multiple stress exposures in soybean. *Functional & integrative genomics*.  
872 2020;20(3):321-41.
- 873 46. Huang L, Schiefelbein J. Conserved gene expression programs in developing roots from diverse  
874 plants. *The Plant Cell*. 2015;27(8):2119-32.
- 875 47. He L, Zhao M, Wang Y, Gai J, He C. Phylogeny, structural evolution and functional diversification  
876 of the plant PHOSPHATE1 gene family: a focus on *Glycine max*. *BMC Evolutionary Biology*.  
877 2013;13(1):1-13.
- 878 48. Liu Y, Xie Y, Wang H, Ma X, Yao W, Wang H. Light and ethylene coordinately regulate the  
879 phosphate starvation response through transcriptional regulation of PHOSPHATE STARVATION  
880 RESPONSE1. *The Plant Cell*. 2017;29(9):2269-84.
- 881 49. Sun Y, Zhou X, Ma H. Genome-wide Analysis of Kelch Repeat-containing F-box Family. *Journal*  
882 *of Integrative Plant Biology*. 2007;49(6):940-52.
- 883 50. Flagel LE, Wendel JF. Gene duplication and evolutionary novelty in plants. *New Phytologist*.  
884 2009;183(3):557-64.
- 885 51. Pei L, Wang B, Ye J, Hu X, Fu L, Li K, et al. Genome and transcriptome of *Papaver somniferum*  
886 Chinese landrace CHM indicates that massive genome expansion contributes to high benzyloquinoline  
887 alkaloid biosynthesis. *Horticulture Research*. 2021;8(1):1-13.
- 888 52. Cannon SB, Shoemaker RC. Evolutionary and comparative analyses of the soybean genome.  
889 *Breeding science*. 2012;61(5):437-44.

- 890 53. Jiang M, Chu Z. Comparative analysis of plant MKK gene family reveals novel expansion  
891 mechanism of the members and sheds new light on functional conservation. *Bmc Genomics*. 2018;19(1):1-  
892 18.
- 893 54. Osorio MB, Ng S, Berkowitz O, De Clercq I, Mao C, Shou H, et al. SPX4 acts on PHR1-dependent  
894 and-independent regulation of shoot phosphorus status in Arabidopsis. *Plant physiology*. 2019;181(1):332-  
895 52.
- 896 55. He Y, Zhang X, Li L, Sun Z, Li J, Chen X, et al. SPX4 interacts with both PHR1 and PAP1 to  
897 regulate critical steps in phosphorus-status-dependent anthocyanin biosynthesis. *New Phytologist*.  
898 2021;230(1):205-17.
- 899 56. Conn S, Gilliam M. Comparative physiology of elemental distributions in plants. *Annals of*  
900 *botany*. 2010;105(7):1081-102.
- 901 57. Conn SJ, Gilliam M, Athman A, Schreiber AW, Baumann U, Moller I, et al. Cell-specific vacuolar  
902 calcium storage mediated by CAX1 regulates apoplastic calcium concentration, gas exchange, and plant  
903 productivity in Arabidopsis. *The Plant Cell*. 2011;23(1):240-57.
- 904 58. Jiao Y, Li J, Tang H, Paterson AH. Integrated syntenic and phylogenomic analyses reveal an  
905 ancient genome duplication in monocots. *The Plant Cell*. 2014;26(7):2792-802.
- 906 59. Tang H, Bowers JE, Wang X, Ming R, Alam M, Paterson AH. Synteny and collinearity in plant  
907 genomes. *Science*. 2008;320(5875):486-8.
- 908 60. Abrouk M, Murat F, Pont C, Messing J, Jackson S, Faraut T, et al. Palaeogenomics of plants:  
909 synteny-based modelling of extinct ancestors. *Trends in plant science*. 2010;15(9):479-87.
- 910 61. Bishop EH, Kumar R, Luo F, Saski C, Sekhon RS. Genome-wide identification, expression  
911 profiling, and network analysis of AT-hook gene family in maize. *Genomics*. 2020;112(2):1233-44.
- 912 62. Letunic I, Doerks T, Bork P. SMART: recent updates, new developments and status in 2015.  
913 *Nucleic acids research*. 2015;43(D1):D257-D60.
- 914 63. Bateman A, Coin L, Durbin R, Finn RD, Hollich V, Griffiths-Jones S, et al. The Pfam protein  
915 families database. *Nucleic acids research*. 2004;32(suppl\_1):D138-D41.
- 916 64. Marchler-Bauer A, Derbyshire MK, Gonzales NR, Lu S, Chitsaz F, Geer LY, et al. CDD: NCBI's  
917 conserved domain database. *Nucleic acids research*. 2015;43(D1):D222-D6.
- 918 65. Sigrist CJ, Cerutti L, De Castro E, Langendijk-Genevaux PS, Bulliard V, Bairoch A, et al.  
919 PROSITE, a protein domain database for functional characterization and annotation. *Nucleic acids research*.  
920 2010;38(suppl\_1):D161-D6.
- 921 66. Horton P, Park K-J, Obayashi T, Fujita N, Harada H, Adams-Collier C, et al. WoLF PSORT:  
922 protein localization predictor. *Nucleic acids research*. 2007;35(suppl\_2):W585-W7.
- 923 67. Wang Y, Tang H, DeBarry JD, Tan X, Li J, Wang X, et al. MCScanX: a toolkit for detection and  
924 evolutionary analysis of gene synteny and collinearity. *Nucleic acids research*. 2012;40(7):e49-e.
- 925 68. Chen C, Chen H, He Y, Xia R. TBtools, a toolkit for biologists integrating various biological data  
926 handling tools with a user-friendly interface. *BioRxiv*. 2018:289660.
- 927 69. Li Q, Guo L, Wang H, Zhang Y, Fan C, Shen Y. In silico genome-wide identification and  
928 comprehensive characterization of the BES1 gene family in soybean. *Heliyon*. 2019;5(6):e01868.
- 929 70. Severin AJ, Cannon SB, Graham MM, Grant D, Shoemaker RC. Changes in twelve homoeologous  
930 genomic regions in soybean following three rounds of polyploidy. *The Plant Cell*. 2011;23(9):3129-36.
- 931 71. Emms DM, Kelly S. OrthoFinder: phylogenetic orthology inference for comparative genomics.  
932 *Genome biology*. 2019;20(1):1-14.
- 933 72. Shen Y, Zhou Z, Wang Z, Li W, Fang C, Wu M, et al. Global dissection of alternative splicing in  
934 paleopolyploid soybean. *The Plant Cell*. 2014;26(3):996-1008.
- 935 73. McDowell IC, Manandhar D, Vockley CM, Schmid AK, Reddy TE, Engelhardt BE. Clustering  
936 gene expression time series data using an infinite Gaussian process mixture model. *PLoS computational*  
937 *biology*. 2018;14(1):e1005896.

938

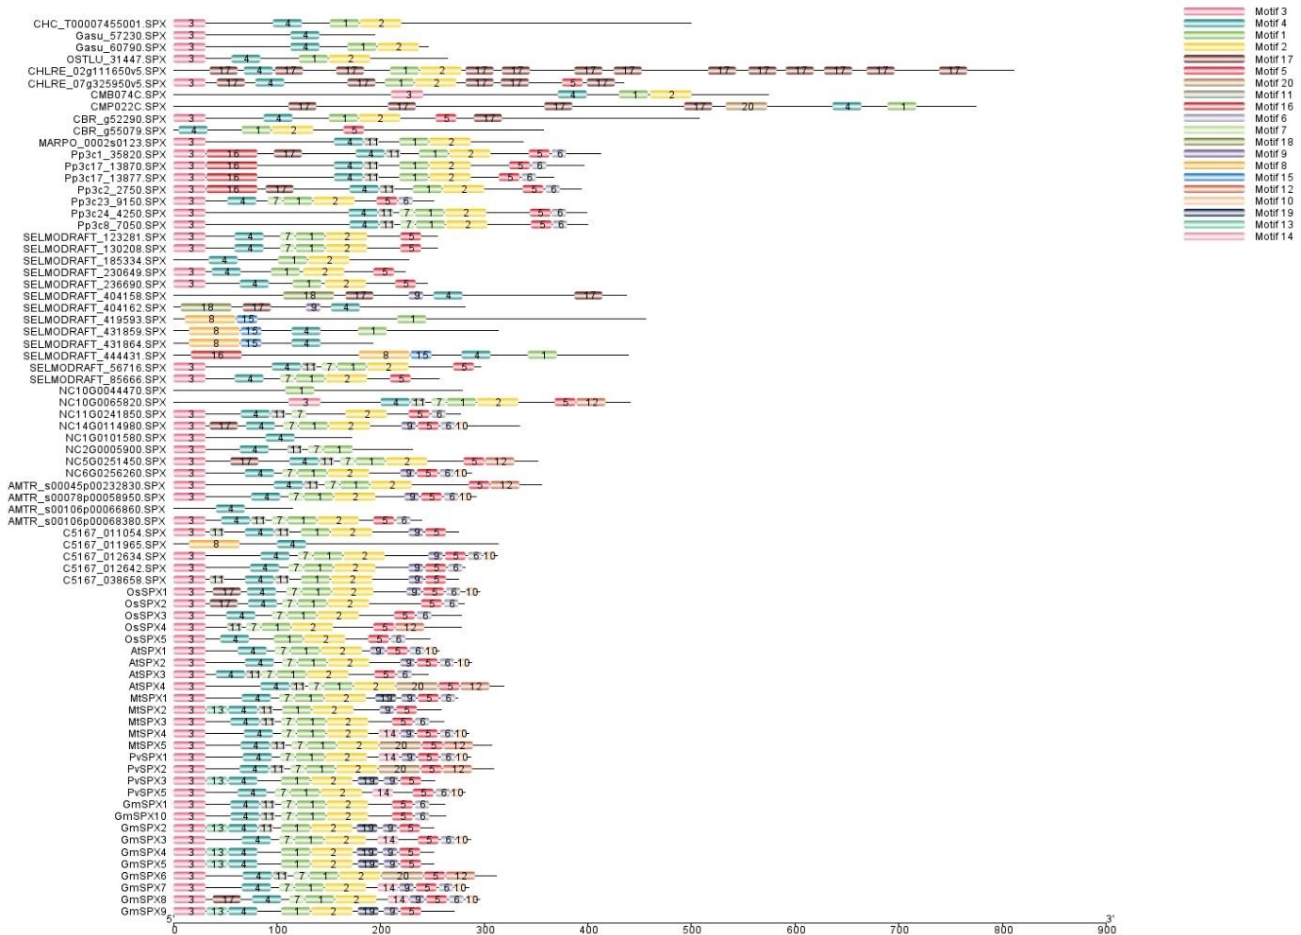

Figure S1. Motif loss and gain in SPX class genes during the evolution from algae to current Angiosperms

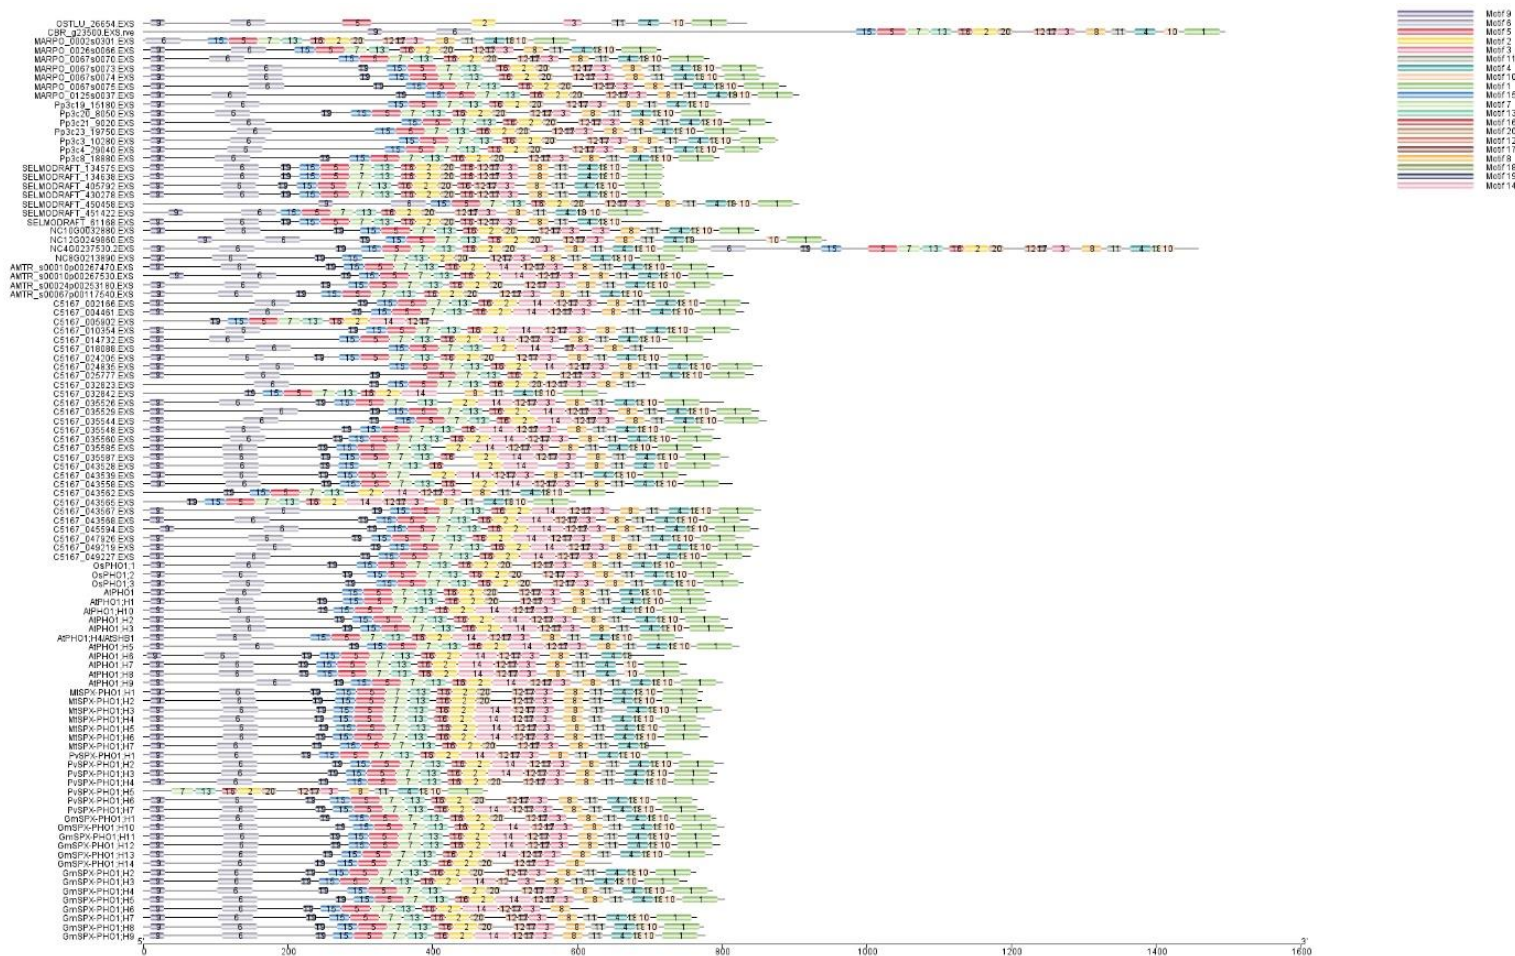

Figure S2. Motif loss and gain in SPX-EXS class genes during the evolution from algae to current Angiosperms

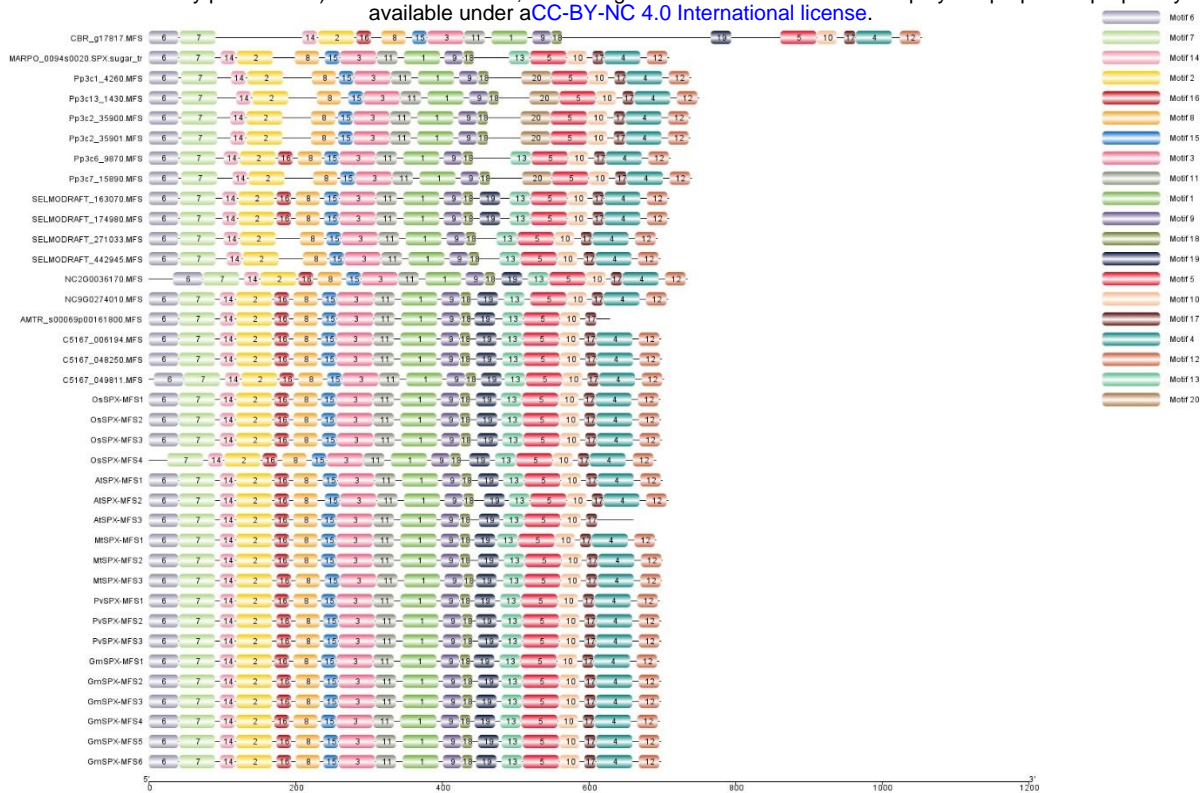

Figure S3. Motif loss and gain in SPX-MFS class genes during the evolution from algae to current Angiosperms

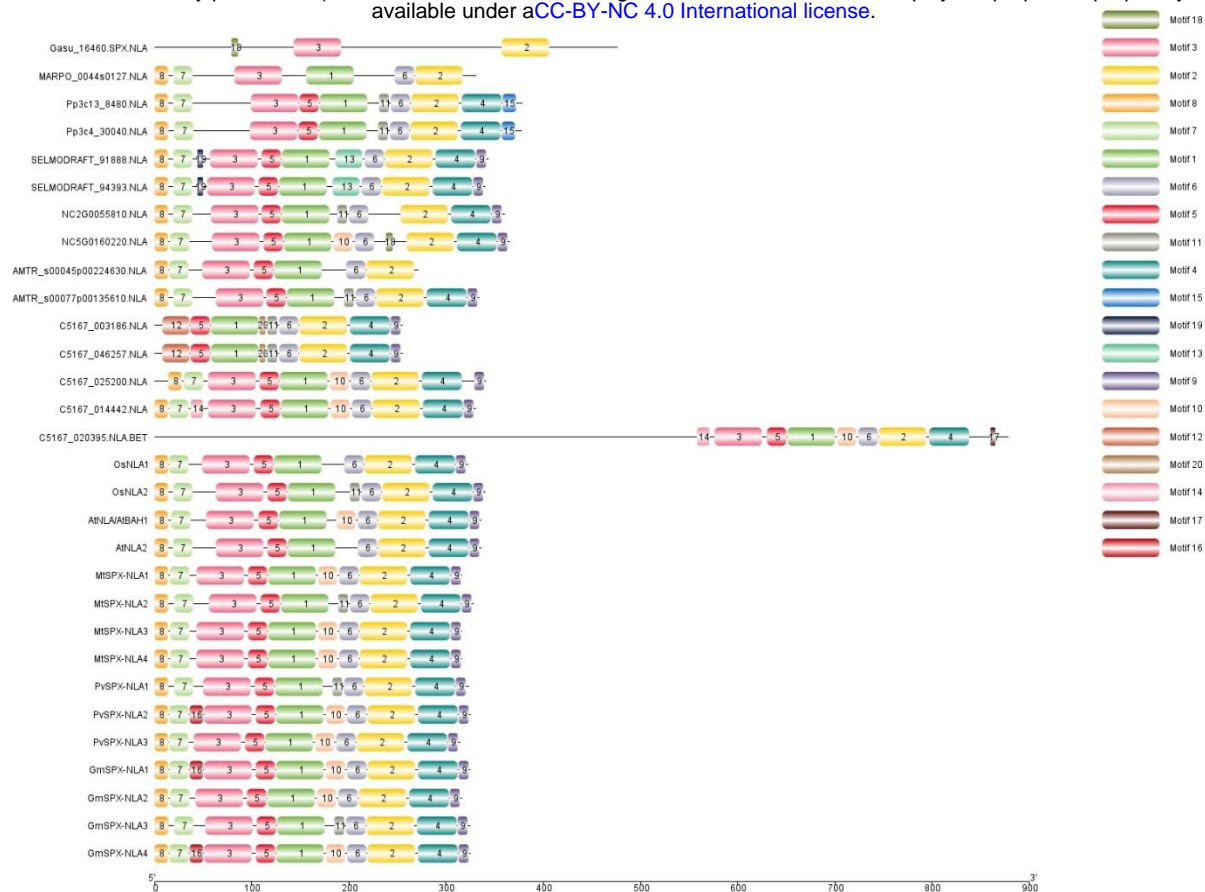

Figure S4. Motif loss and gain in SPX-RING class genes during the evolution from algae to current Angiosperms



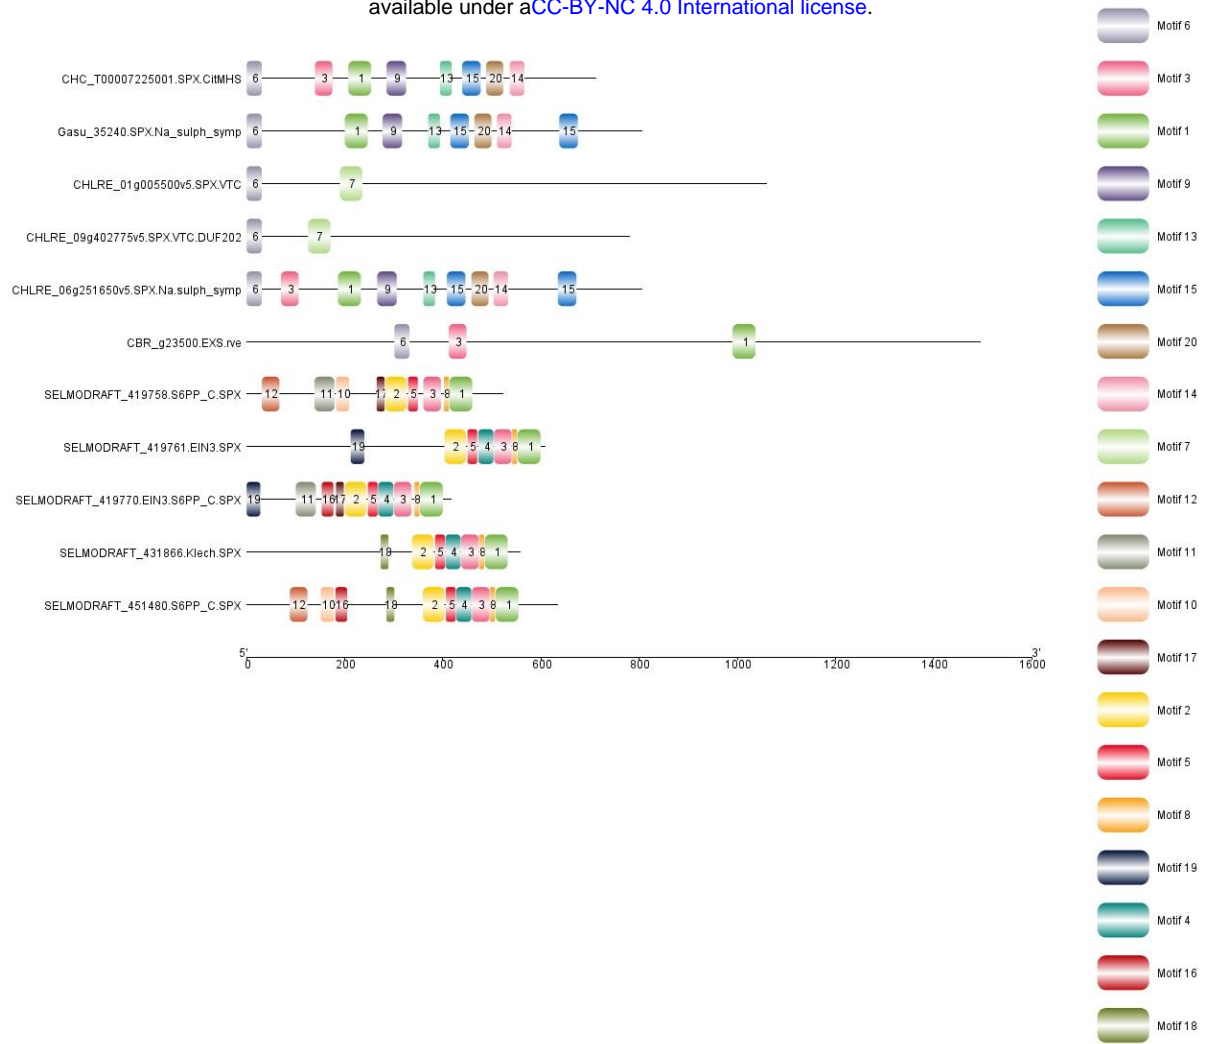

Figure S5. Motifs specifically-found in the new classes of SPX proteins in basal plants

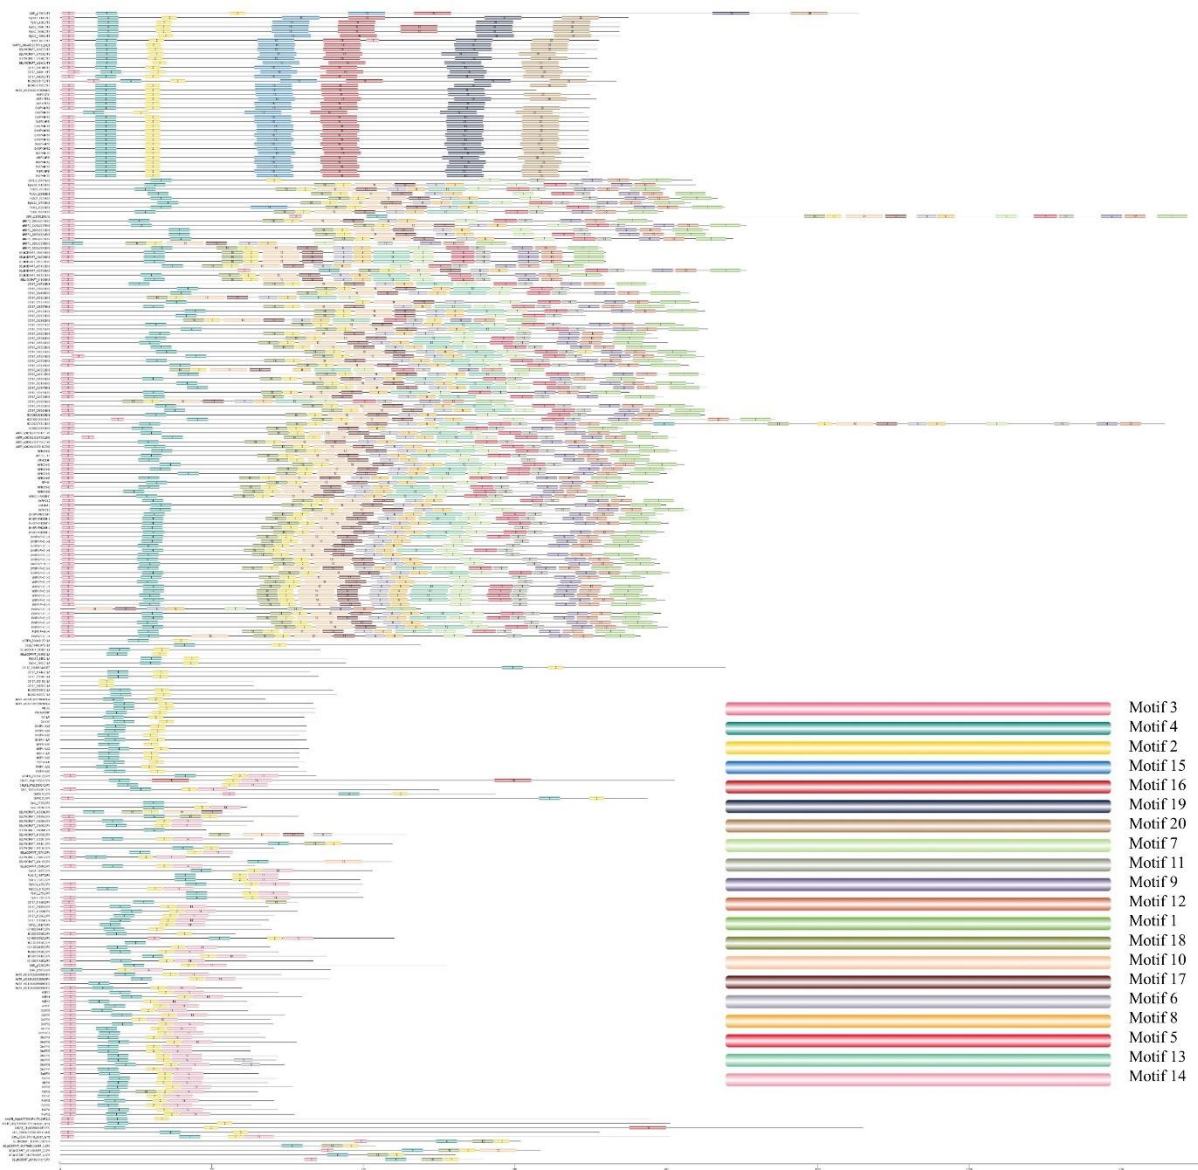

Figure S6. Motif loss and gain of all SPX proteins during the evolution from algae to current Angiosperms

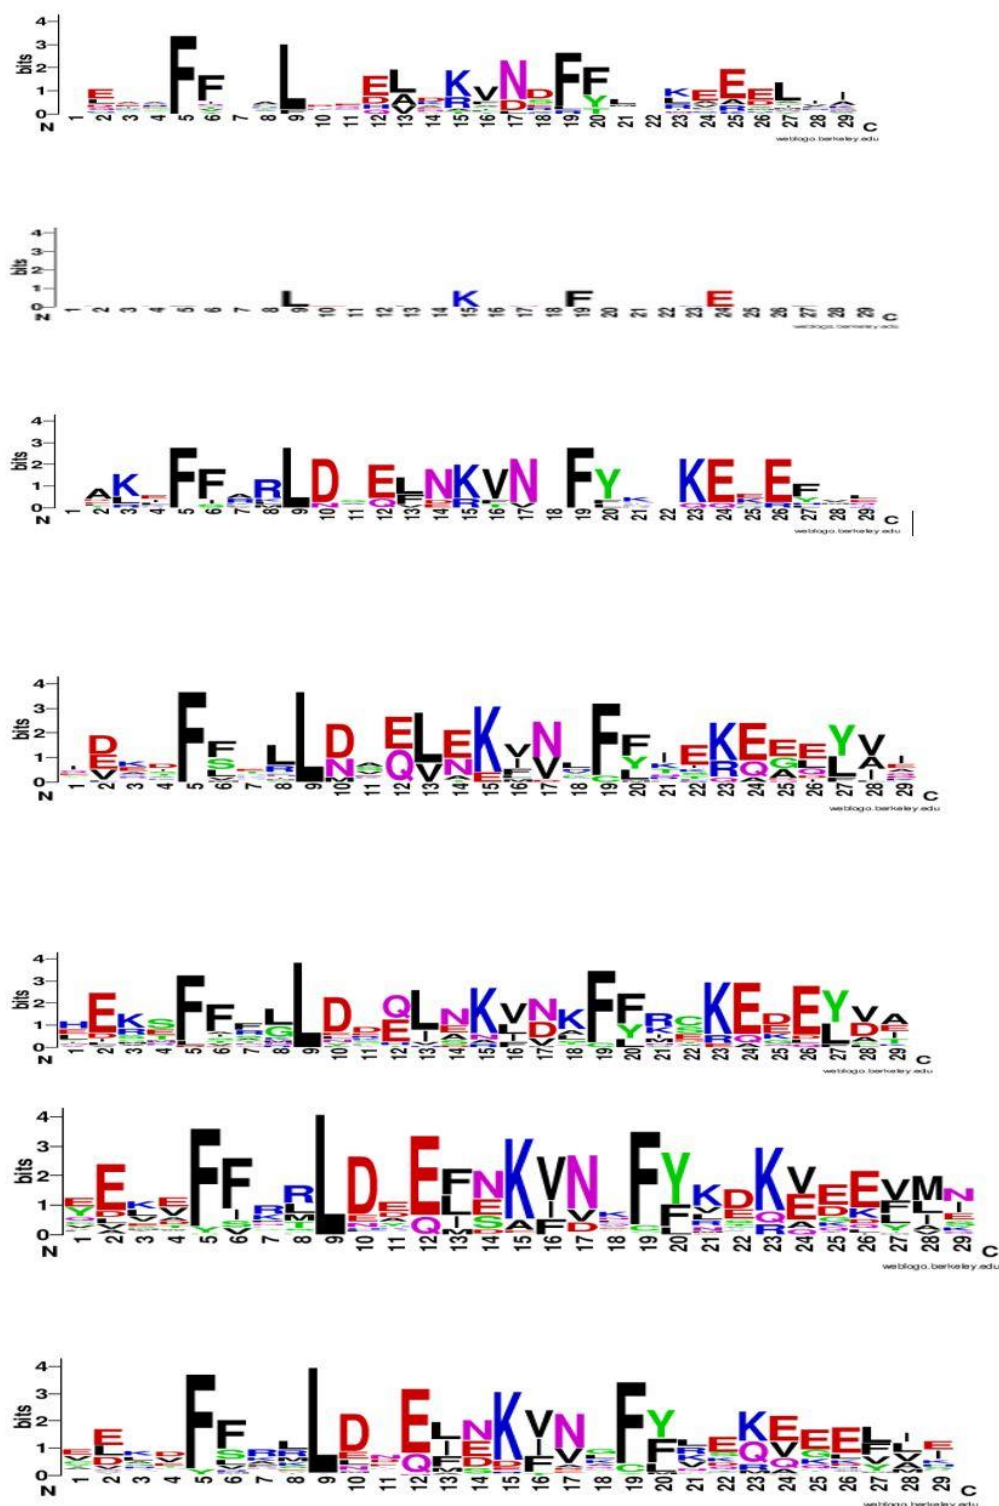

Figure S7. Consensus sequences of motif 4 in SPX domain conserved in whole SPX proteins; in different phyla. Order of phyla from up to down: algae (*C.reinhardtii*, *O. lucimarinus*, *G. sulfuraria*, *C. crispus*, *C. merolae*), charophytes (*C. braunii*), liverwort (*M. polymorpha*), bryophytes (*P. patens*), lycophytes (*S. moellendorffii*), basal angiosperms (*A. thricopoda*, *P. sumniferum*, *N. colorata*), and current angiosperm (Arabidopsis, rice, soybean, common bean, alfalfa).

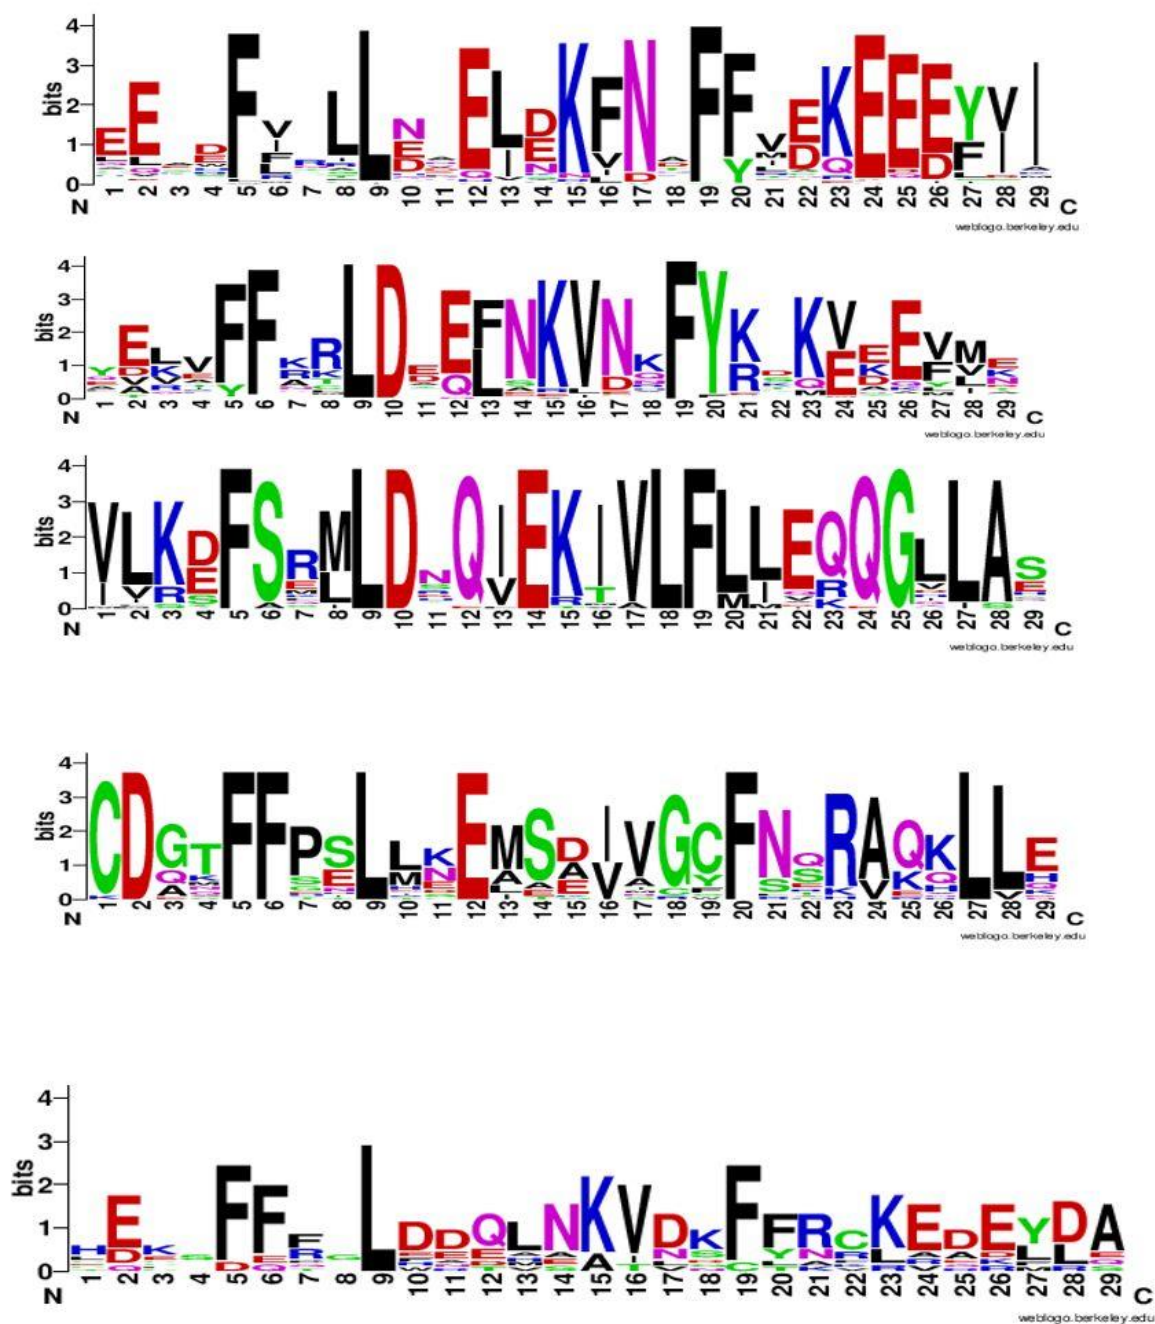

Figure S8. Consensus sequences of motif 4 in SPX domain conserved in whole SPX proteins; in different classes. Order of different classes from up to down: SPX, EXS, MFS, RING, new identified classes.

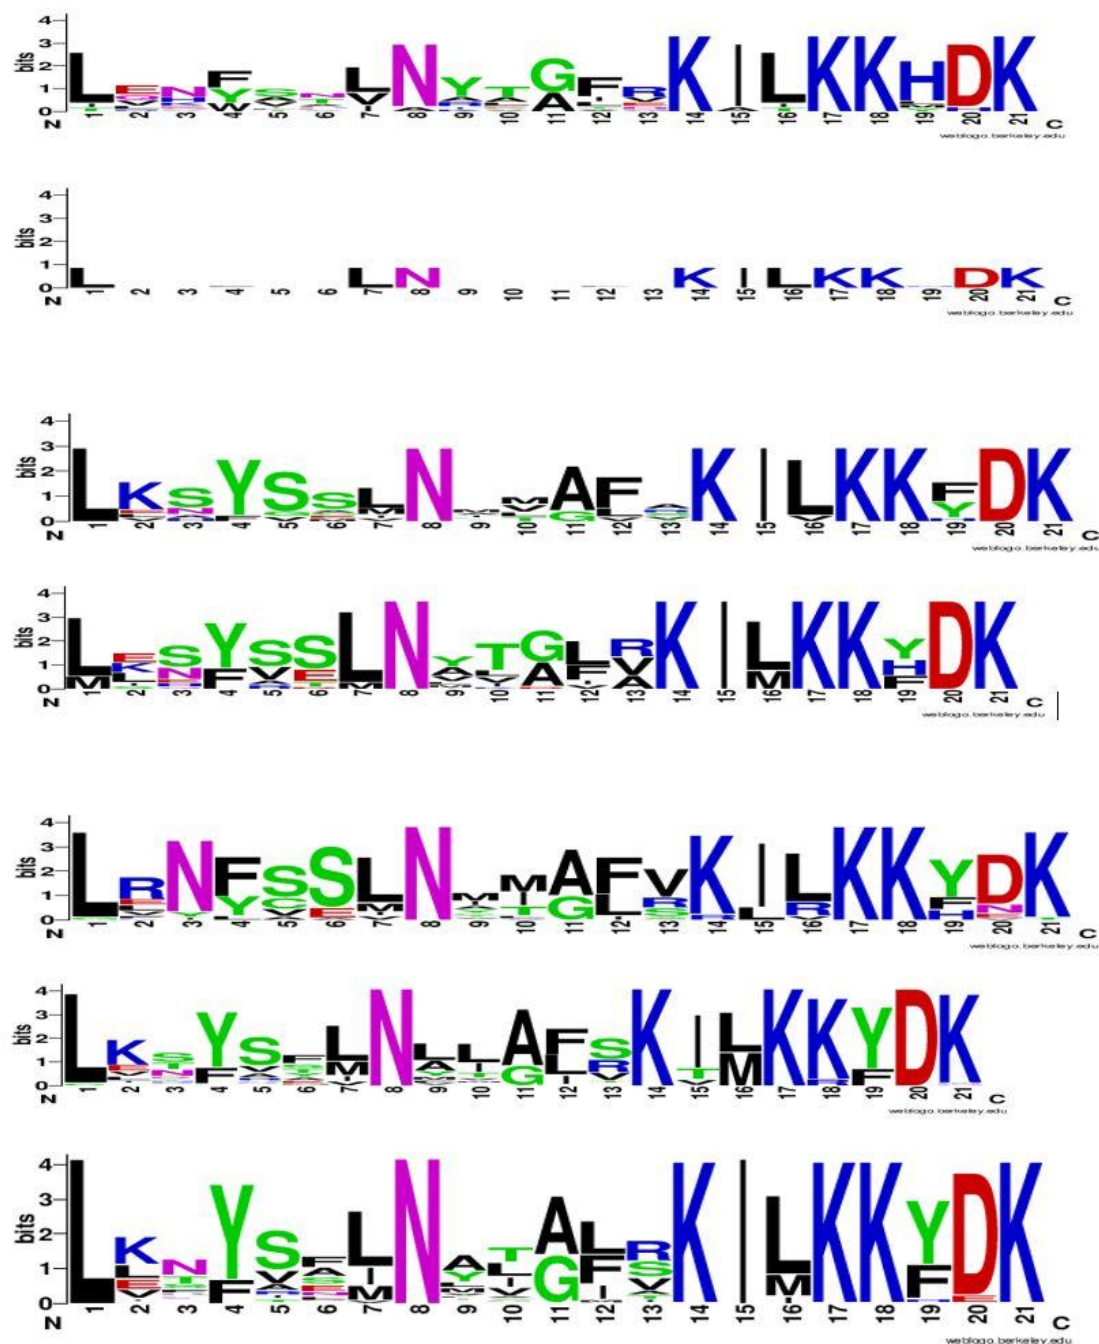

Figure S9. Consensus sequences of motif 2 in SPX domain conserved in whole SPX proteins; in different phyla. Order of phyla from up to down: algae (*C.reinhardtii*, *O. lucimarinus*, *G. sulfuraria*, *C. crispus*, *C. merolae*), charophytes (*C. braunii*), liverwort (*M. polymorpha*), bryophytes (*P. patens*), lycophytes (*S. moellendorffii*), basal angiosperms (*A. thricopoda*, *P. sumniferum*, *N. colorata*), and current angiosperm (Arabidopsis, rice, soybean, common bean, alfalfa).

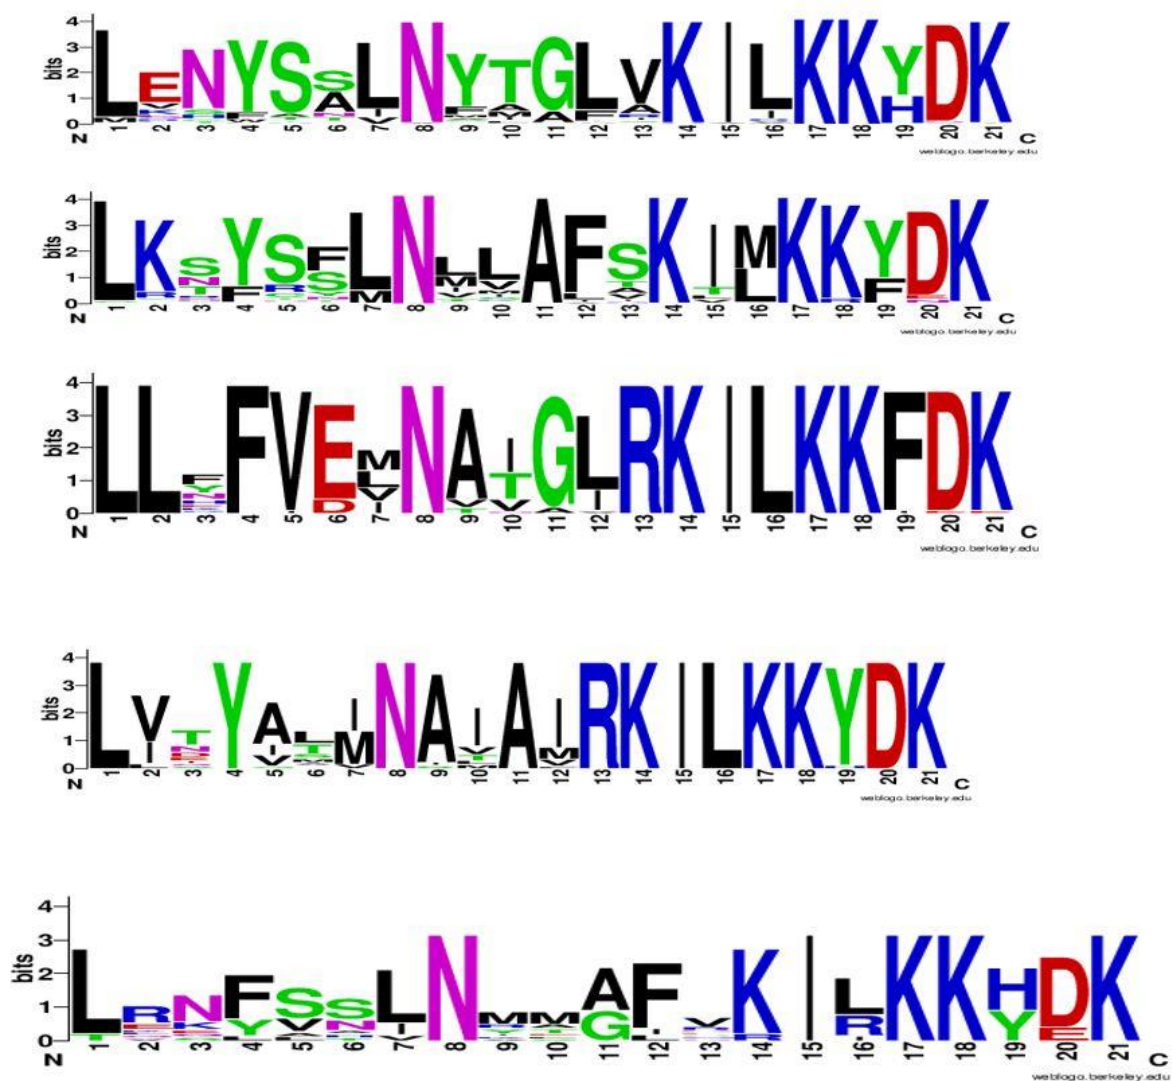

Figure S10. Consensus sequences of motif 2 in SPX domain conserved in whole SPX proteins; in different classes. Order of different classes from up to down: SPX, EXS, MFS, RING, new identified classes.

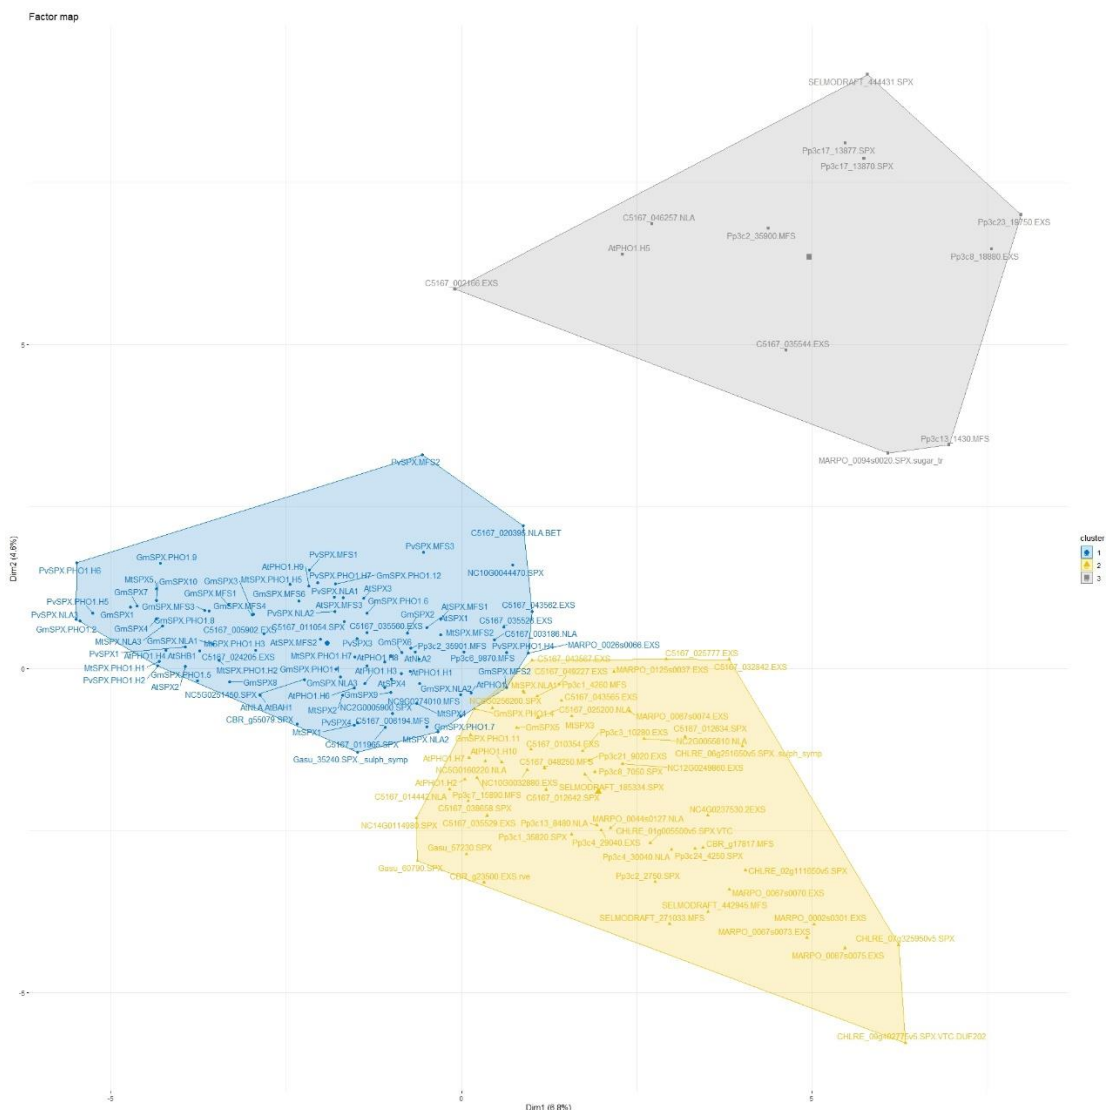

Figure S11. Hierarchical Clustering on Principal Components (HCPC) of SPXs in the lower plants and current Angiosperms based on presence or absence of Cis-acting elements in their promoters.

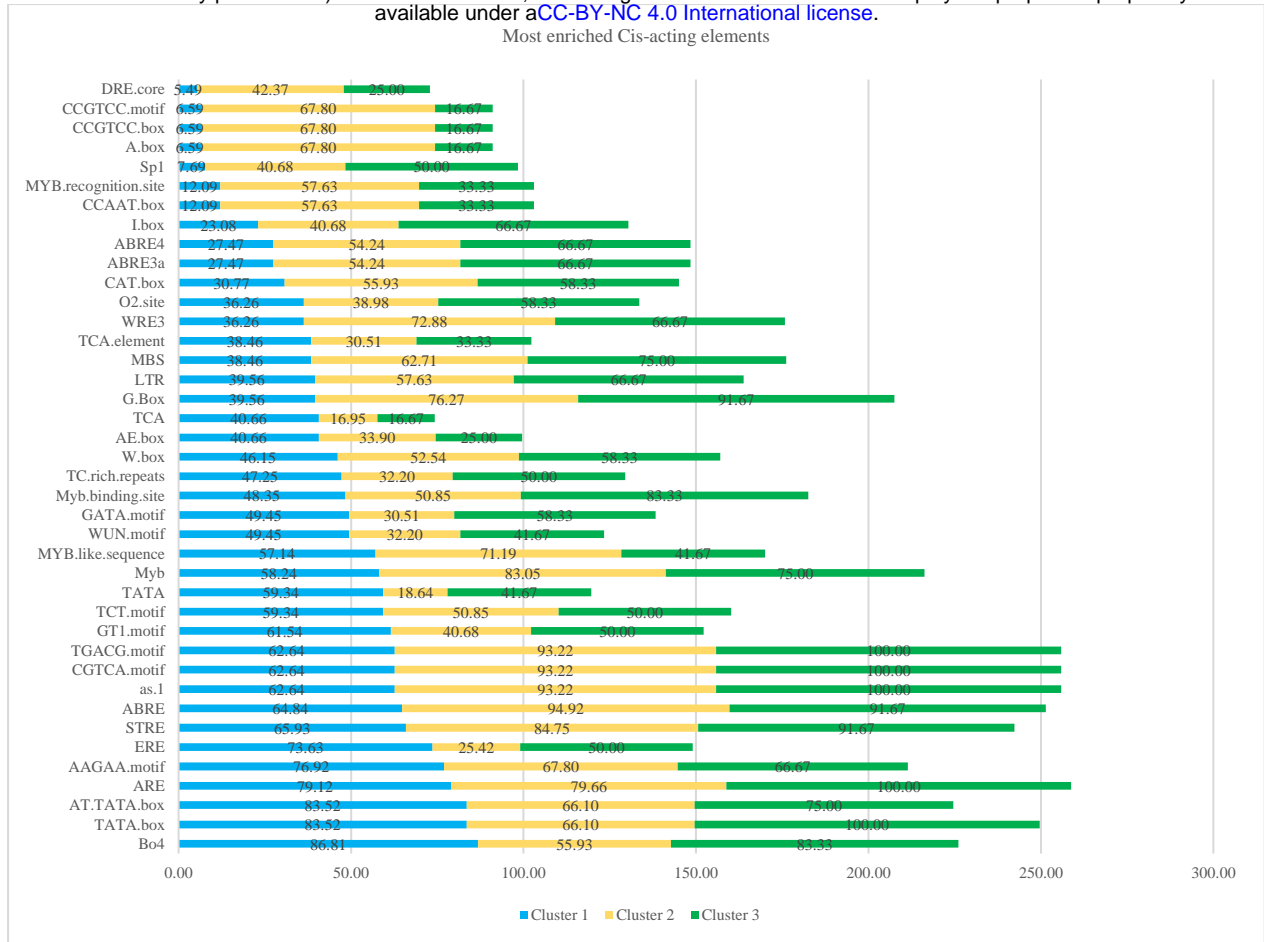

Figure S12. Production of genes in each cluster containing the most frequent Cis-acting elements. The clusters were shown in different colors: cluster 1= blue, cluster 2= yellow, and cluster 3= green.



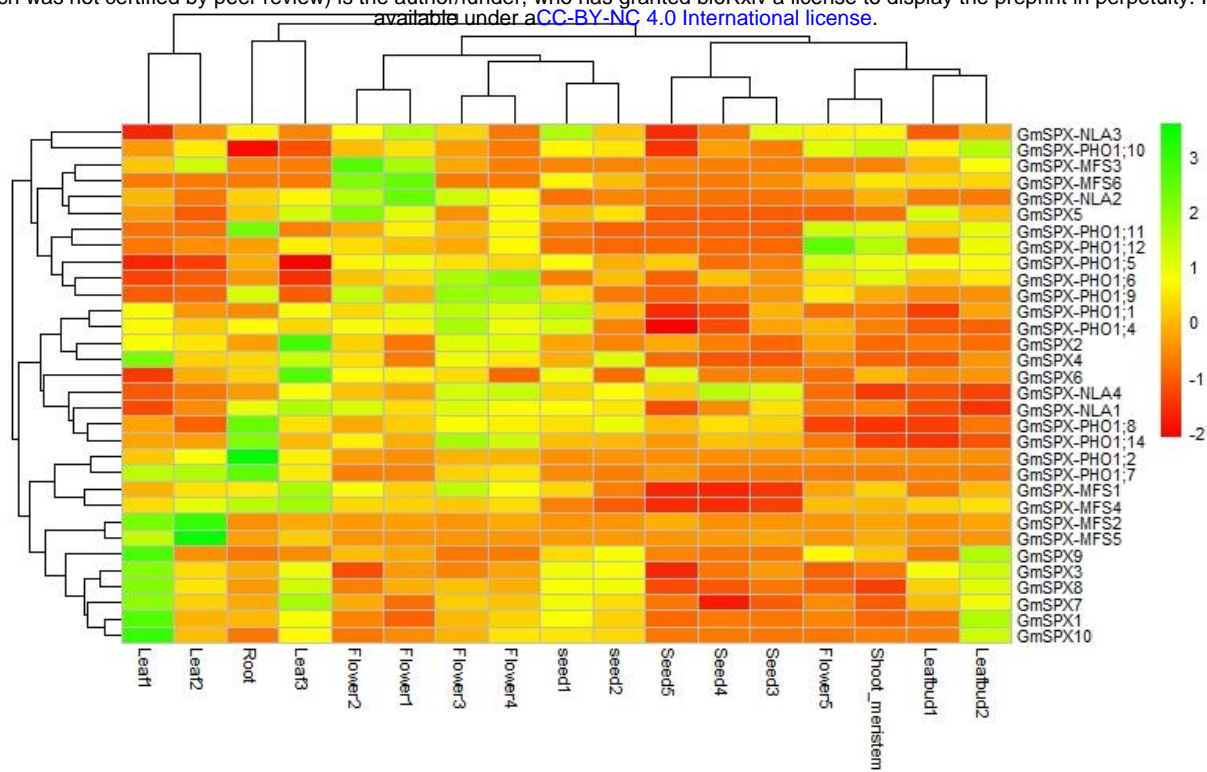

Figure S13. Expression levels of *GmSPX*s in the different developmental stages of different tissues. Using data from PRJNA238493 bioproject.

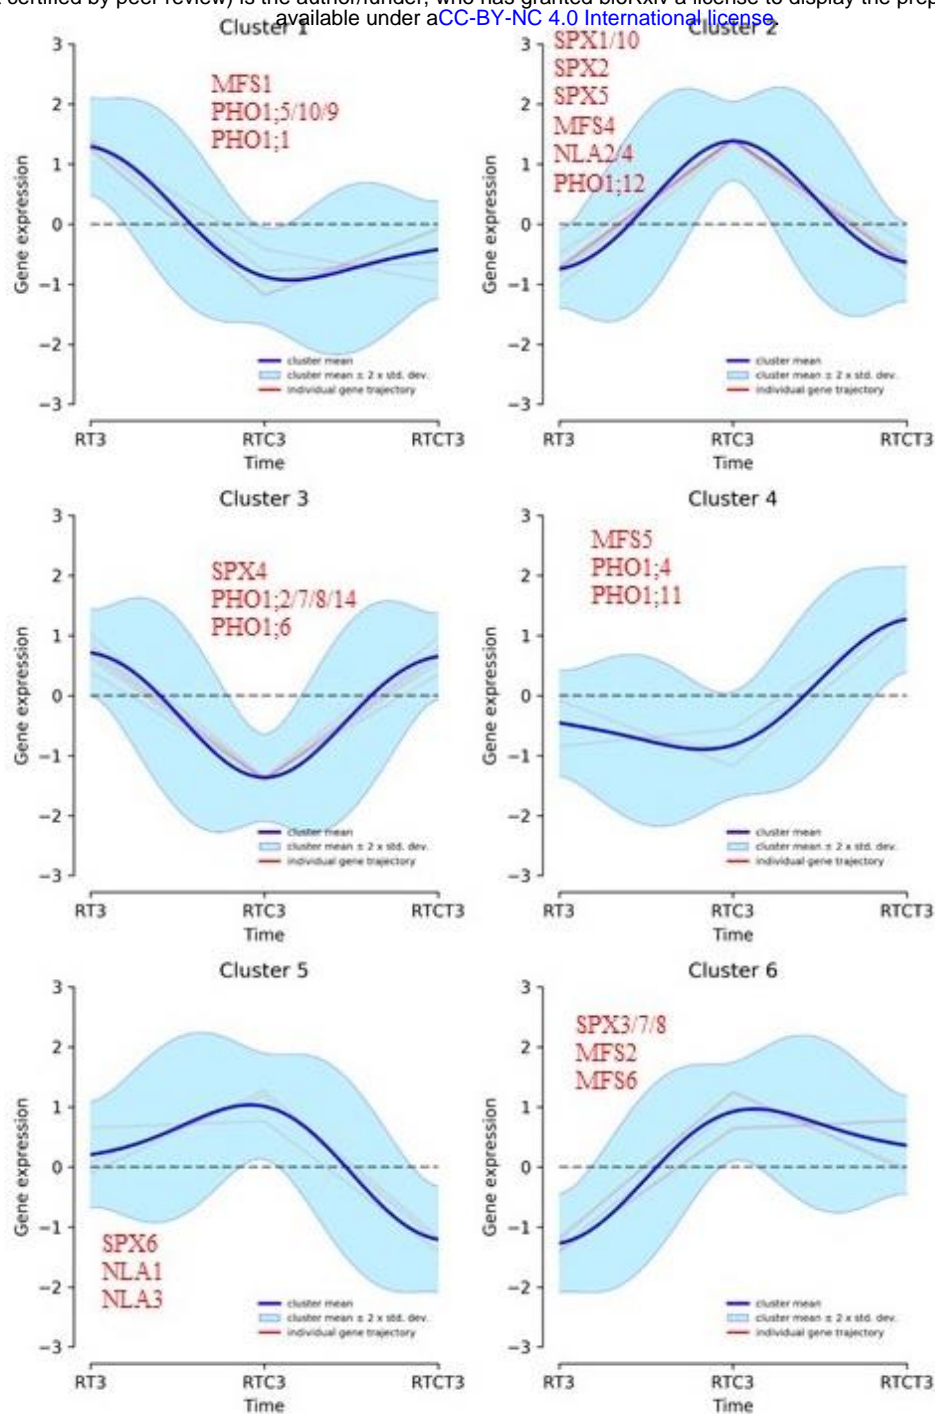

Figure S14. Regulation of SPX genes by phosphate starvation in the roots. DPGP analysis was performed for expression pattern of GmSPXs in roots during three time-points; RT= P deficiency, RTC= P deficiency and recovery, and RTCT = P deficiency, recovery, and second P deficiency. Shown are clustered trajectories of GmSPX genes. The cluster means are in blue, the individual SPX genes are shown in red. Using data from PRJNA544698 bioproject.

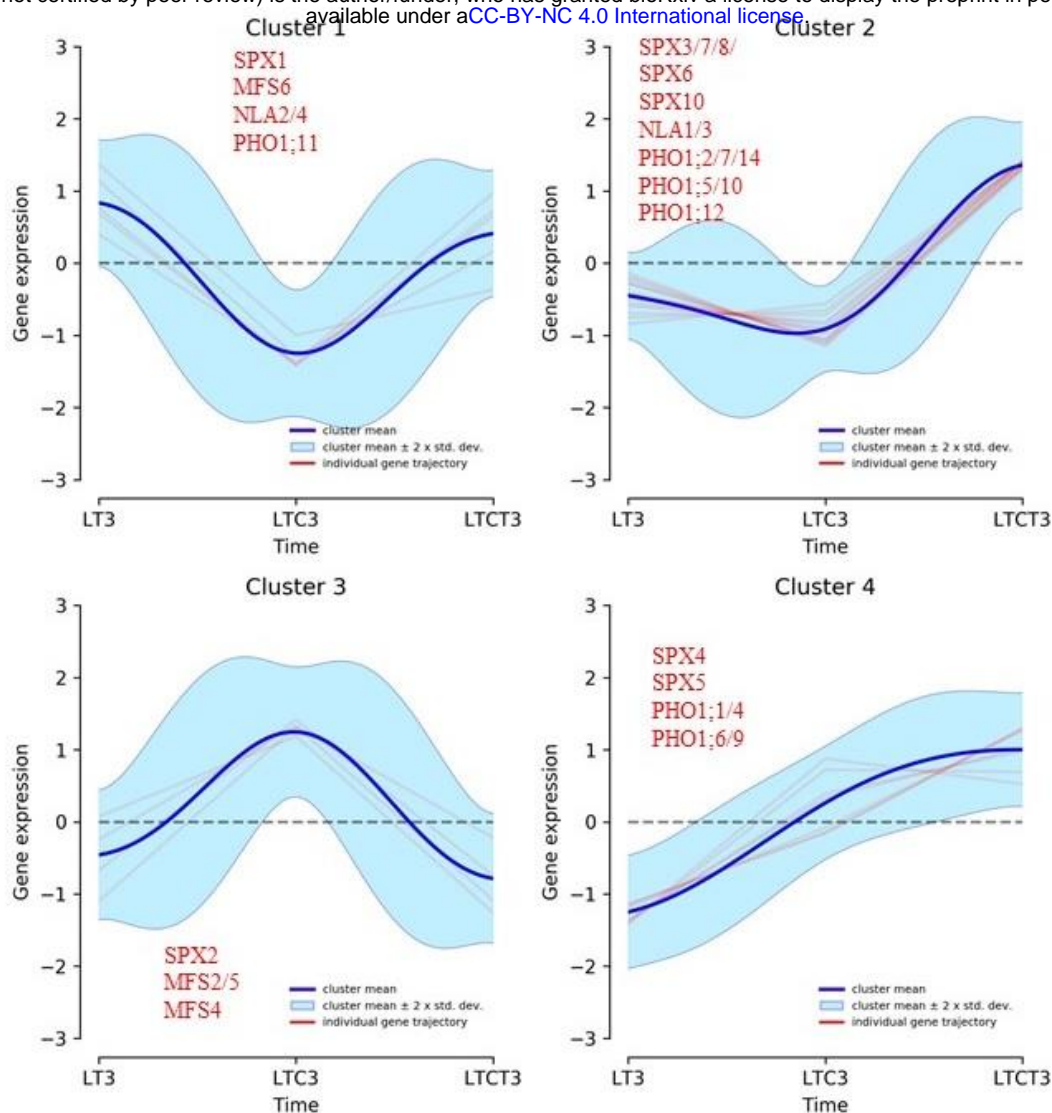

Figure S15. Regulation of SPX genes by phosphate starvation in the leaves. DPGP analysis was performed for expression pattern of GmSPXs in leaves during three time-points; RT= P deficiency, RTC= P deficiency and recovery, and RTCT = P deficiency, recovery, and second P deficiency. Shown are clustered trajectories of GmSPX genes. The cluster means are in blue, the individual SPX genes are shown in red. Using data from PRJNA544698 bioproject.

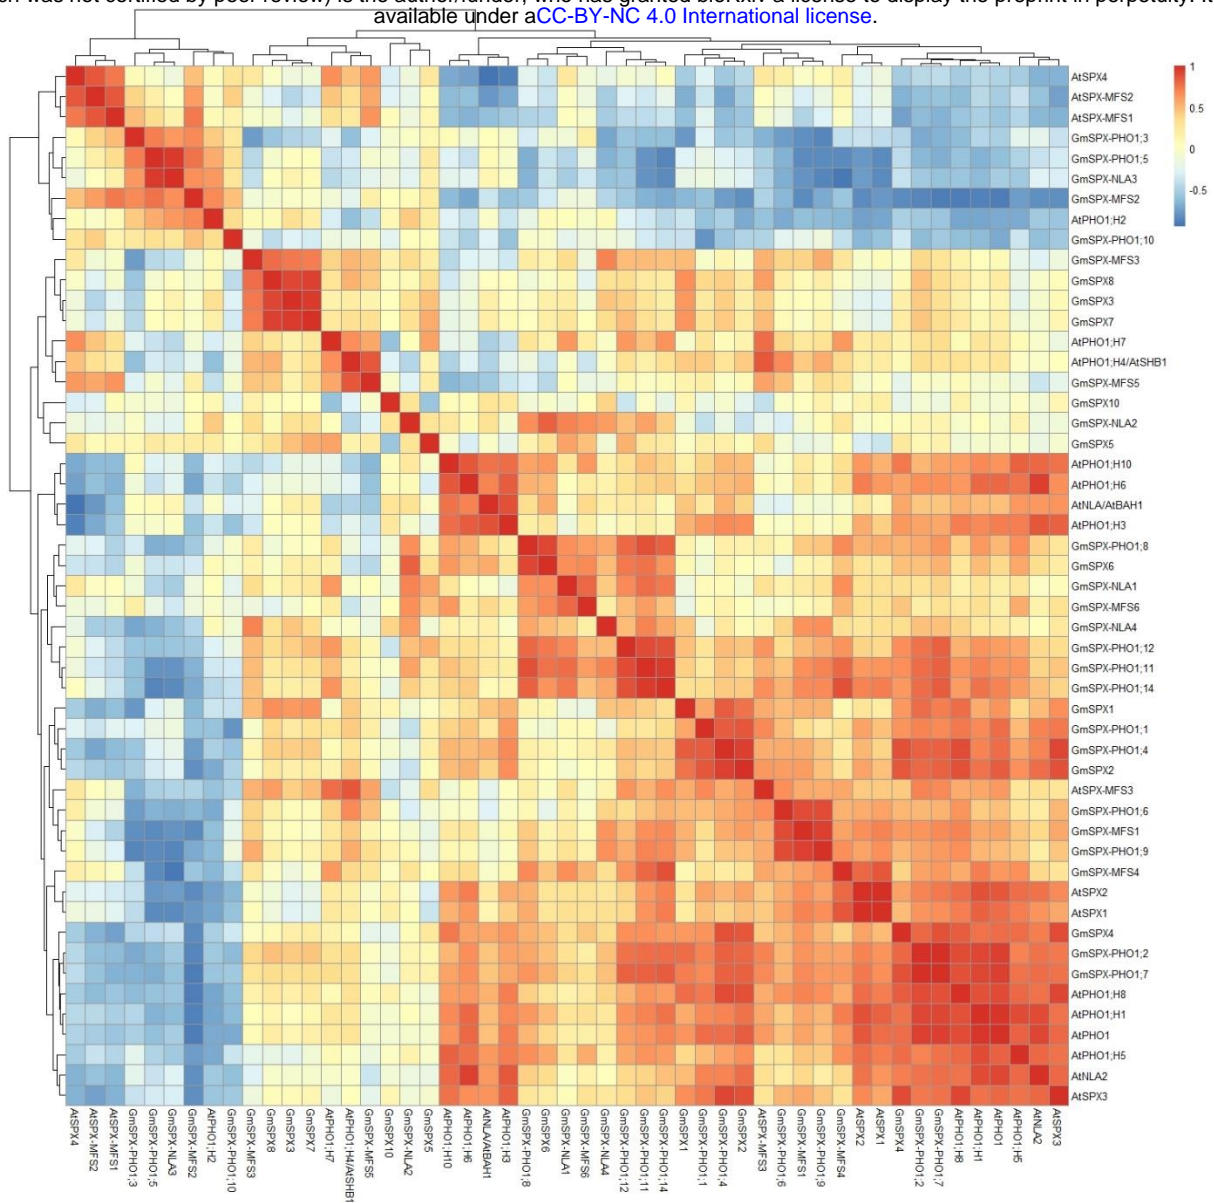

Figure S16. Correlation heat map of SPX genes in soybean and Arabidopsis using RNA-seq datasets from three different zones of roots (GSE64665).
